# Supplementary material for: Synthesis of 3,3-disubstituted-2,3-dihydroazanaphthoquinones via simultaneous alkyne oxidation and nitrile hydration of ortho-alkynylarenenitriles
Source: Royal Society of Chemistry journal article supplement (doi:10.1039/c4ob00852a), 2014-01-01

## Electronic Supplementary Information

### Synthesis of 3, 3-Disubstituted-2,3-dihydroazanaphthoquinones *via* Simultaneous Alkyne Oxidation and Nitrile Hydration of *ortho*-Alkynylarenenitriles

**Karuppusamy Sakthivel and Kannupal Srinivasan\***

*School of Chemistry, Bharathidasan University, Tiruchirappalli-620 024, Tamil Nadu, India*

*srinivasank@bdu.ac.in*

## Contents

Copies of  $^1\text{H}$  NMR and  $^{13}\text{C}$  NMR spectra

S2-S35

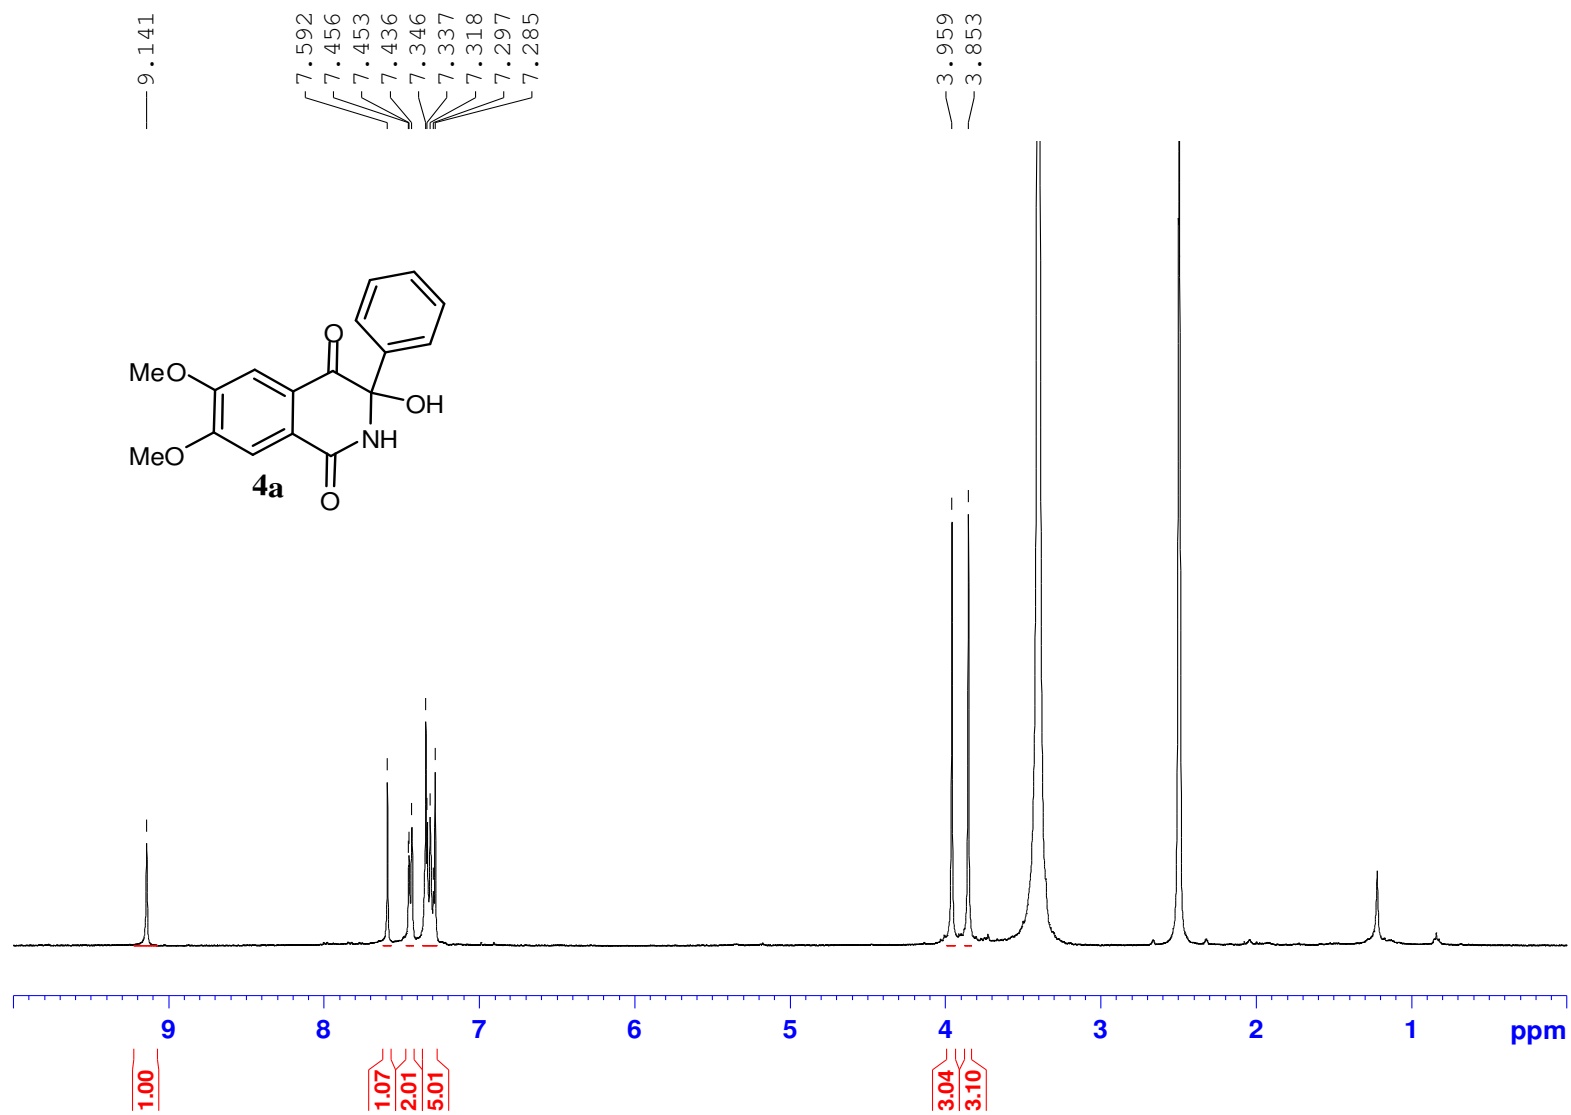

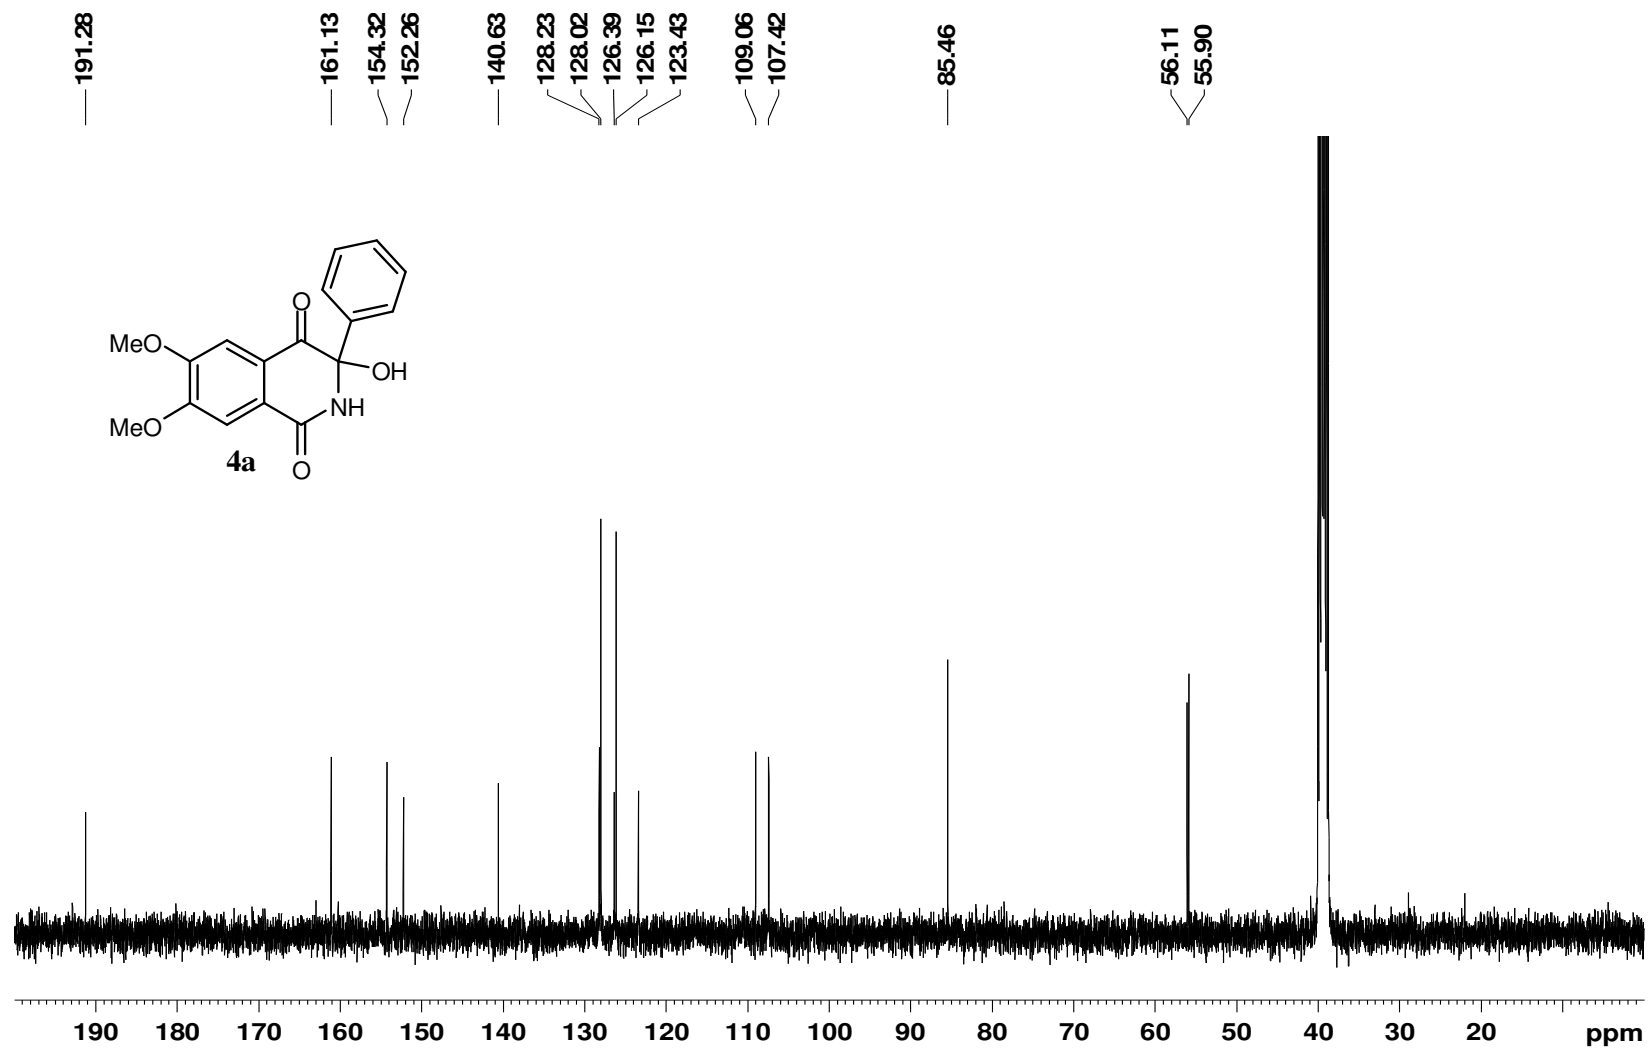

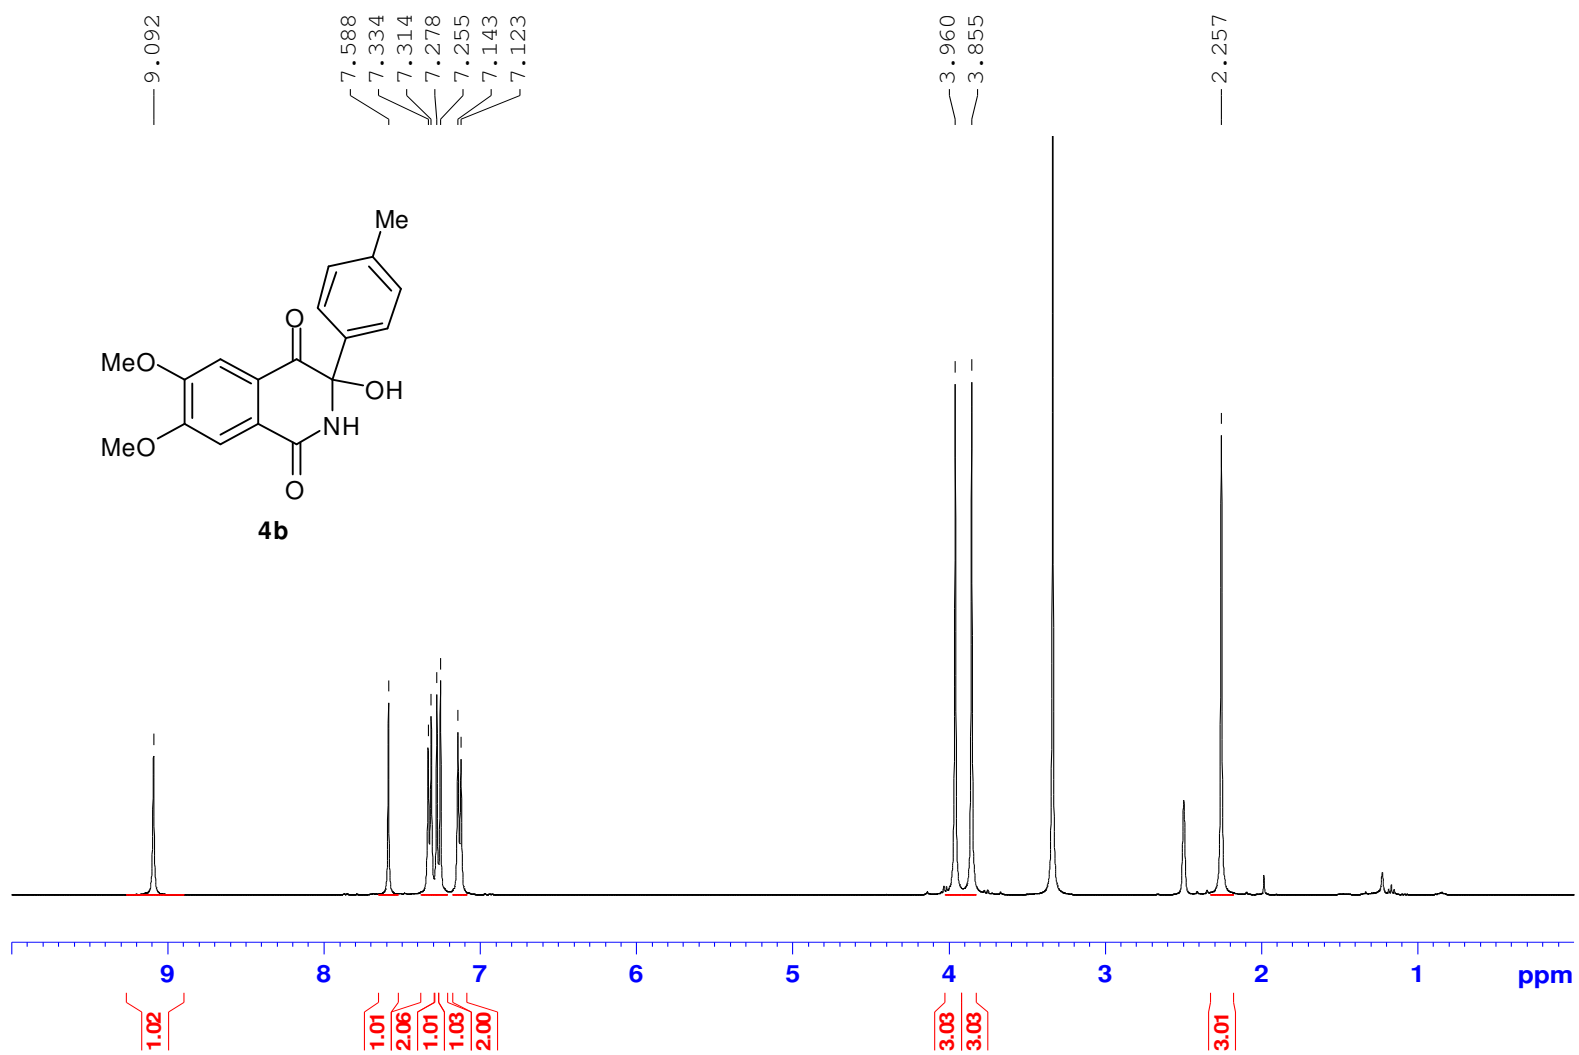

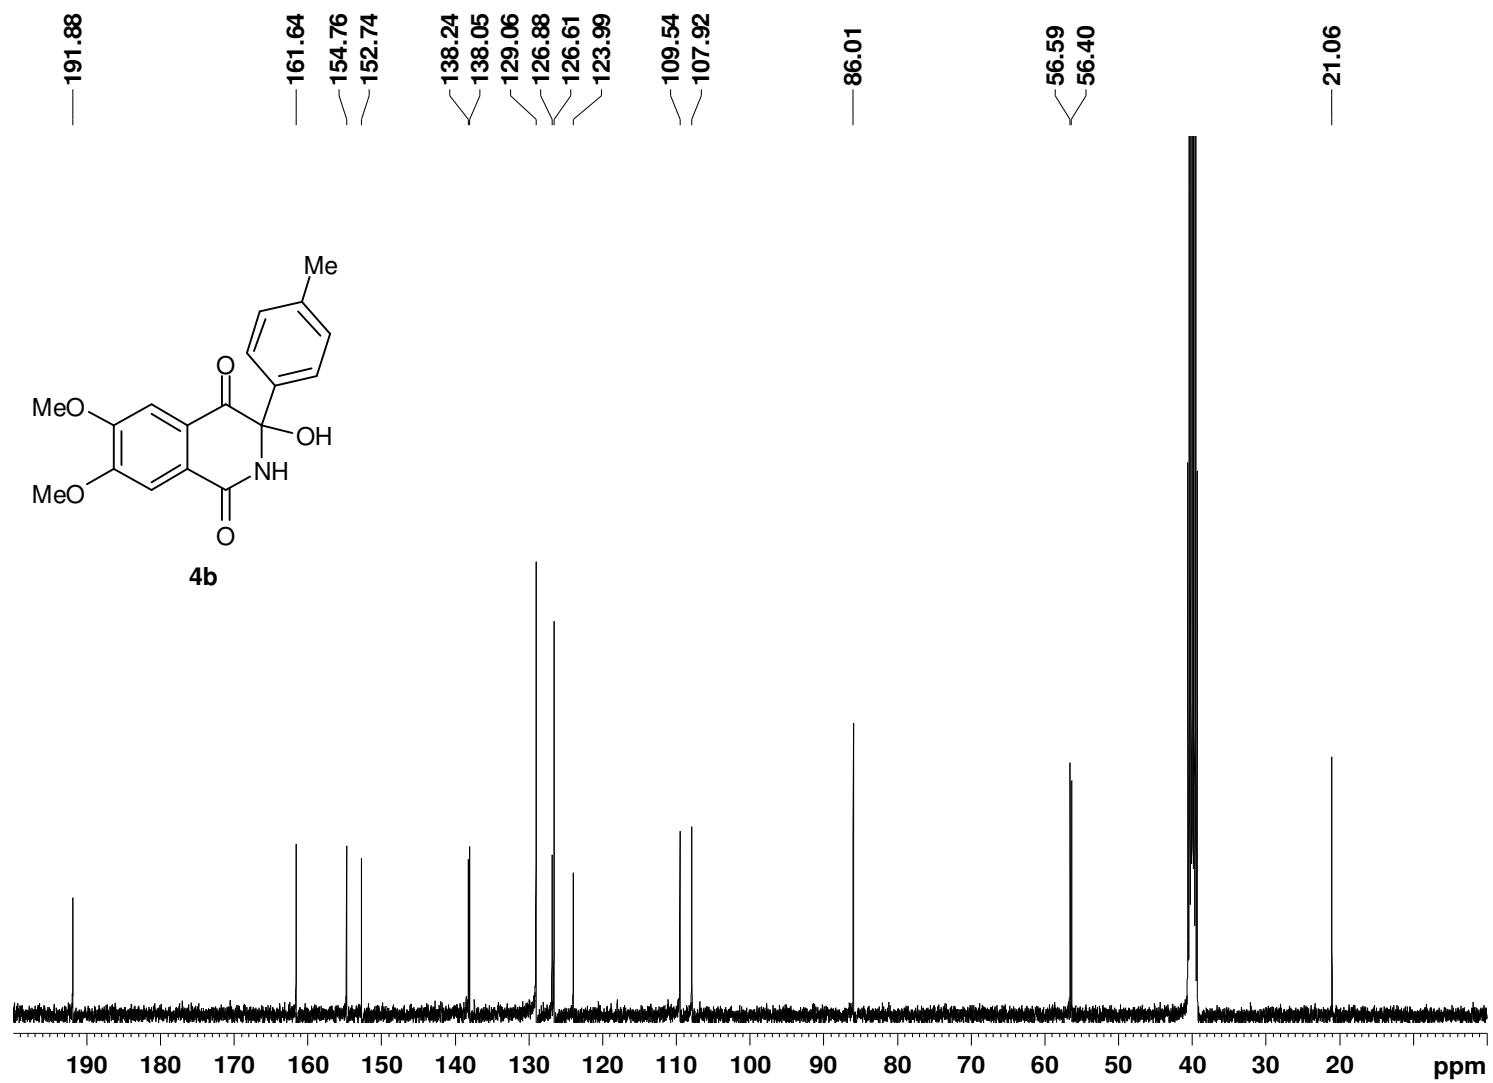

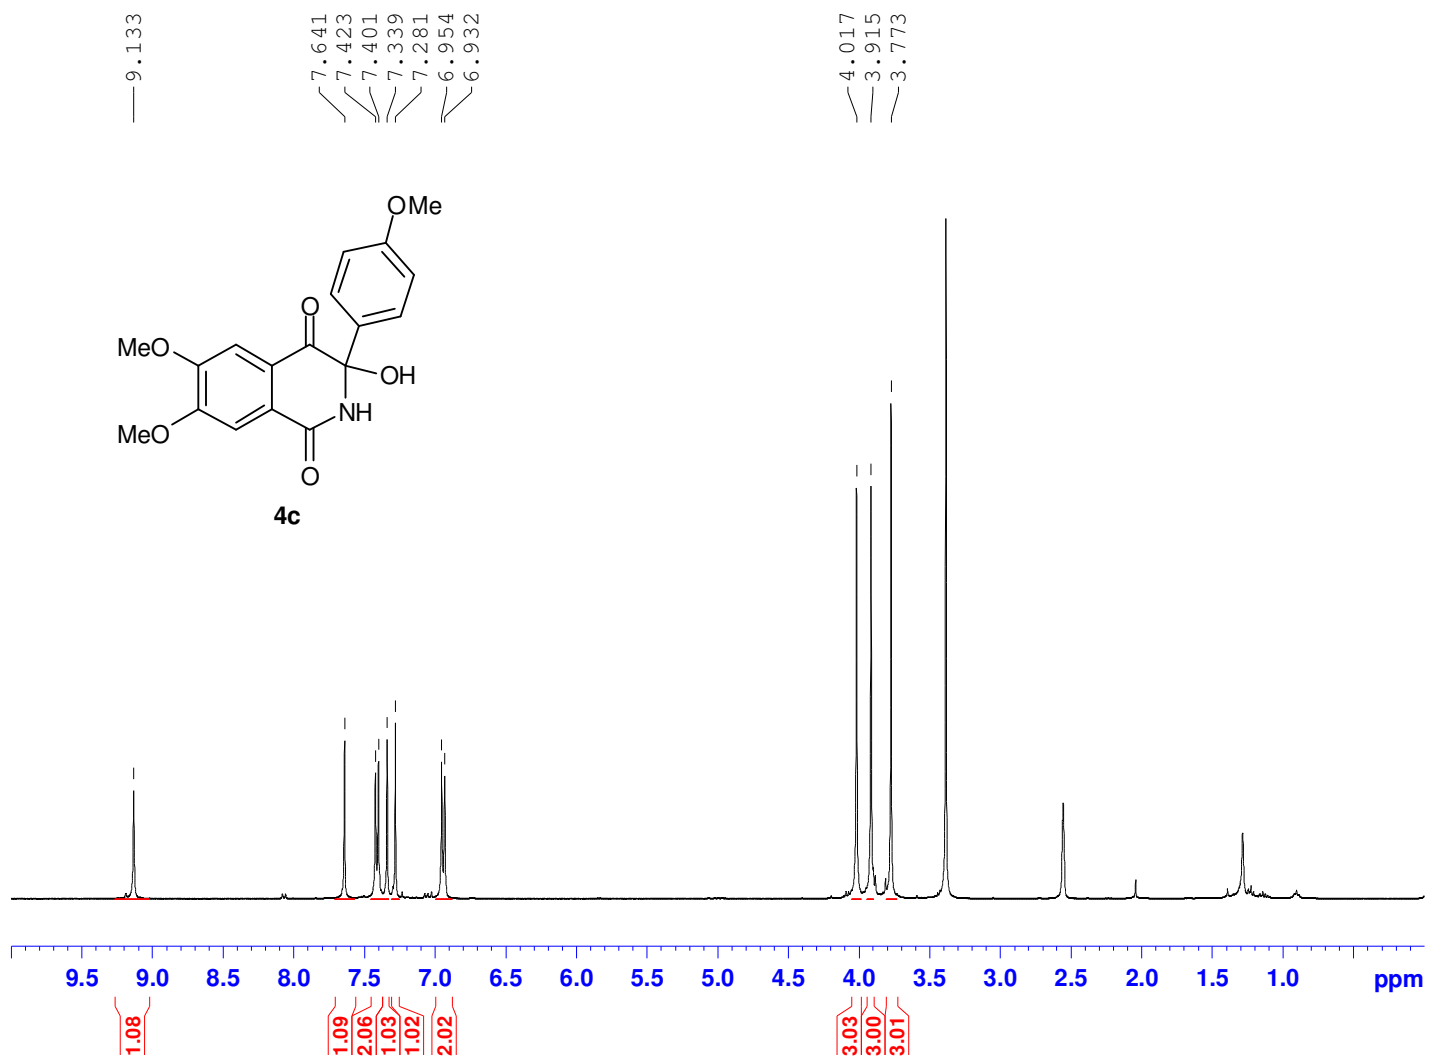

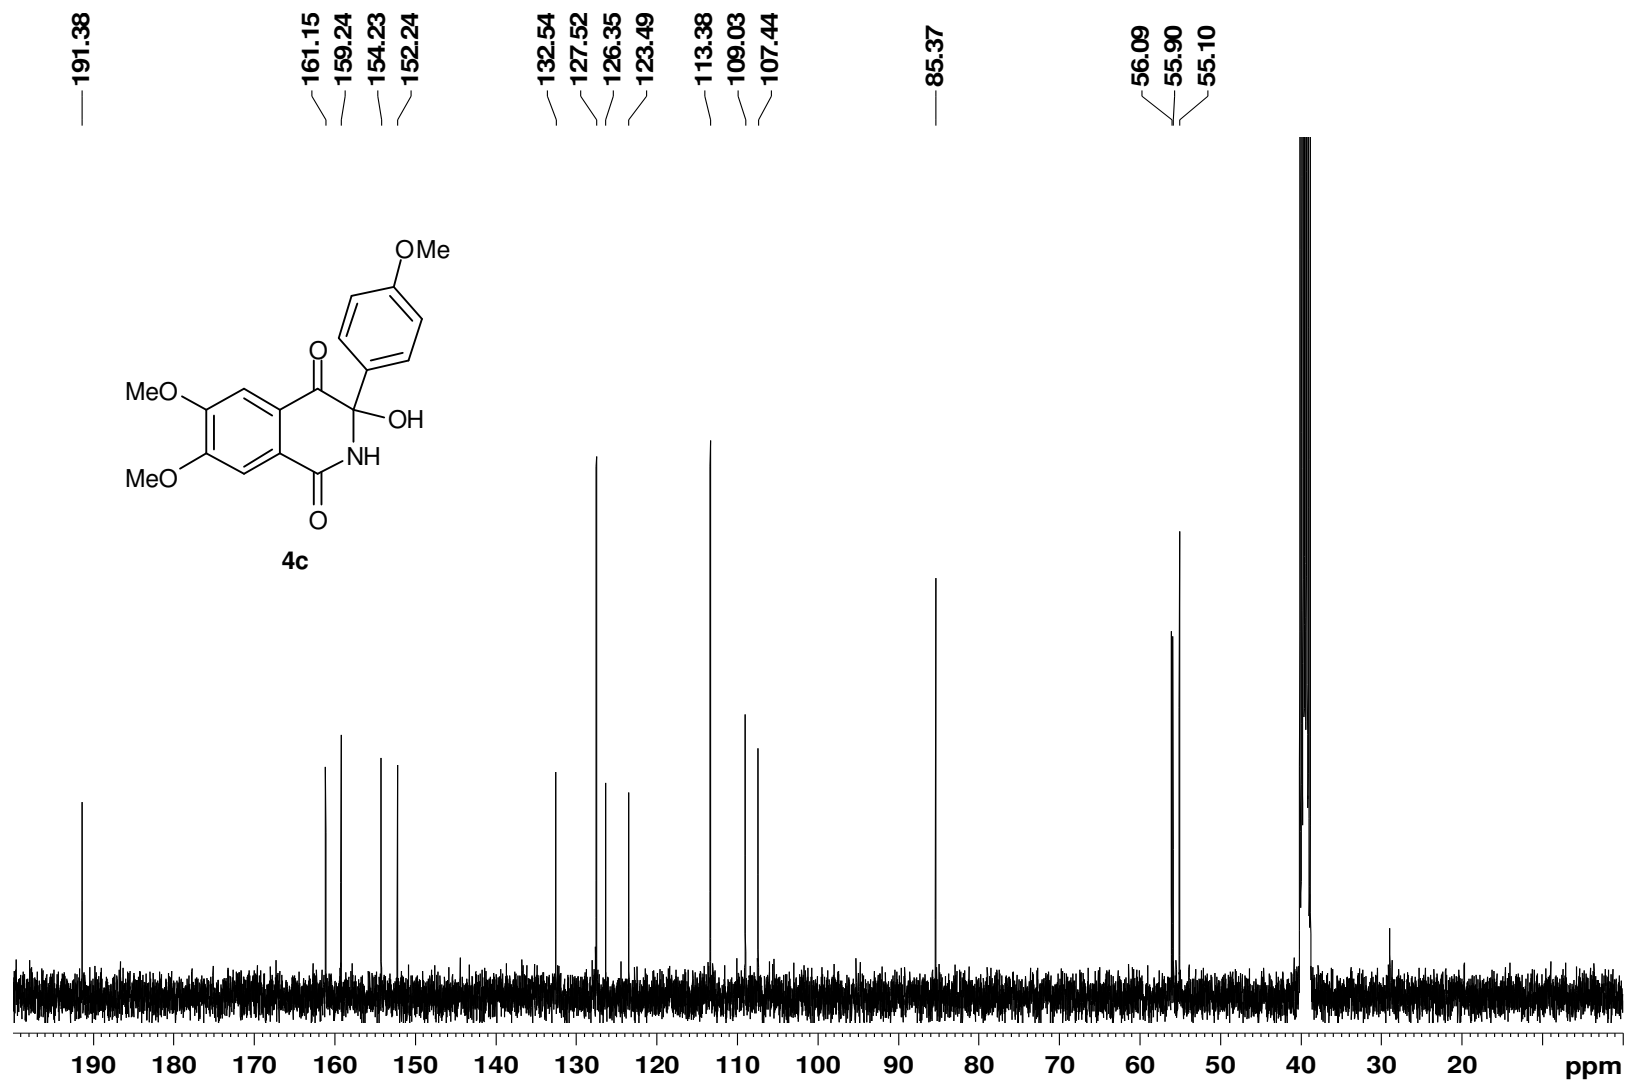

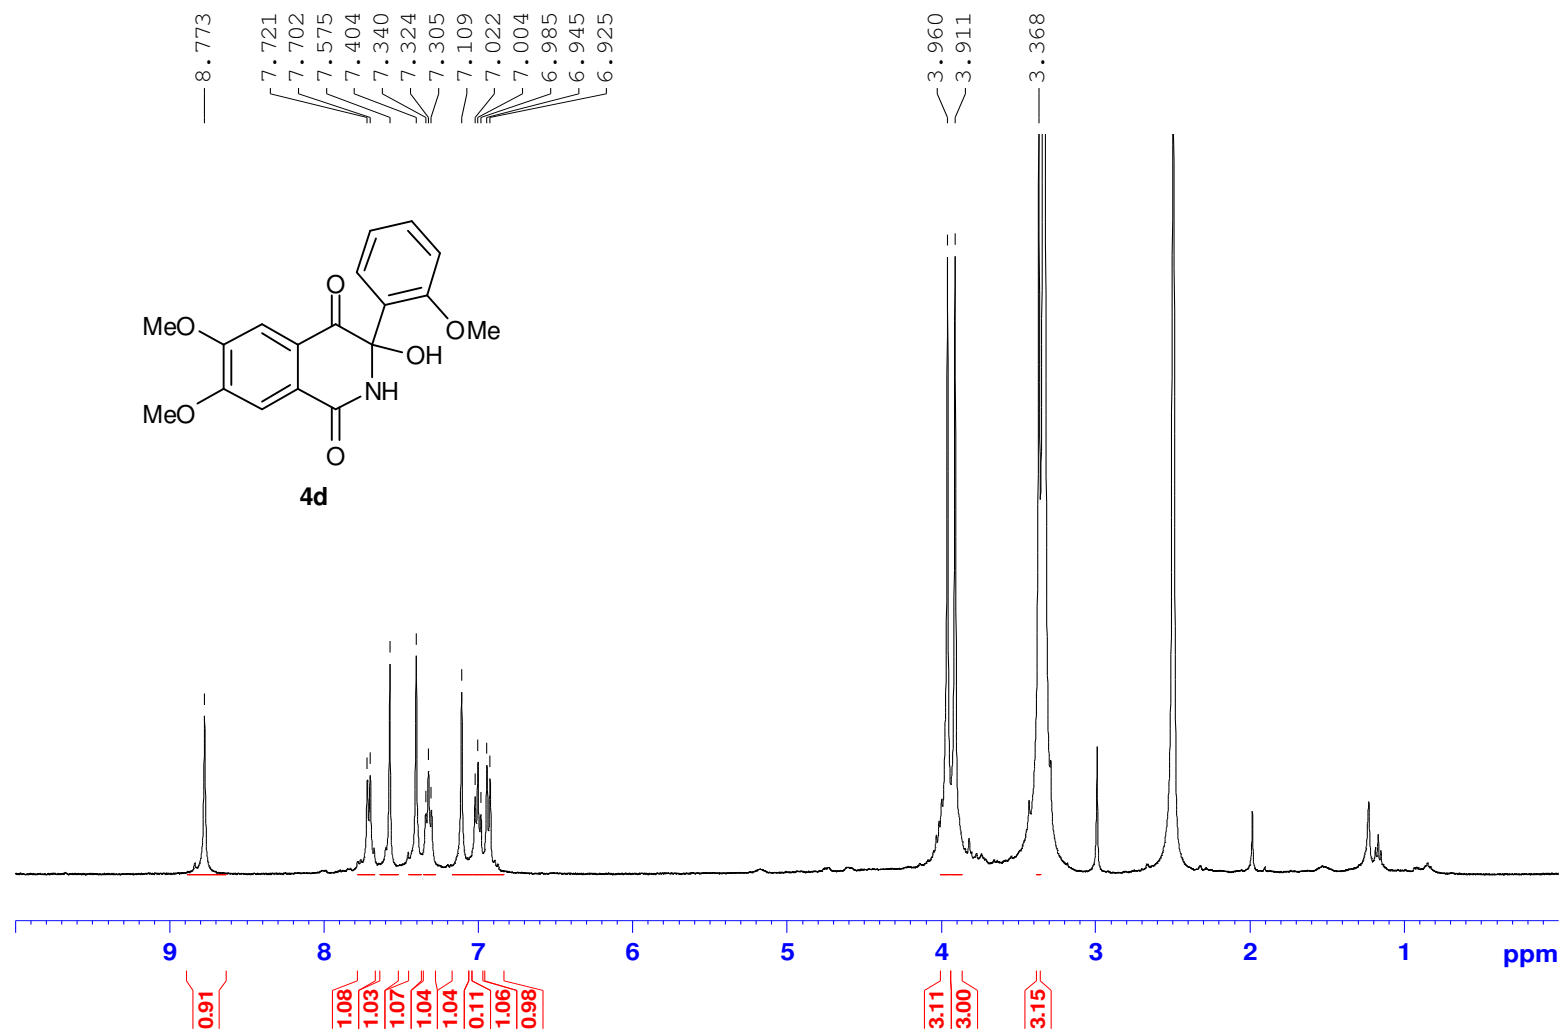



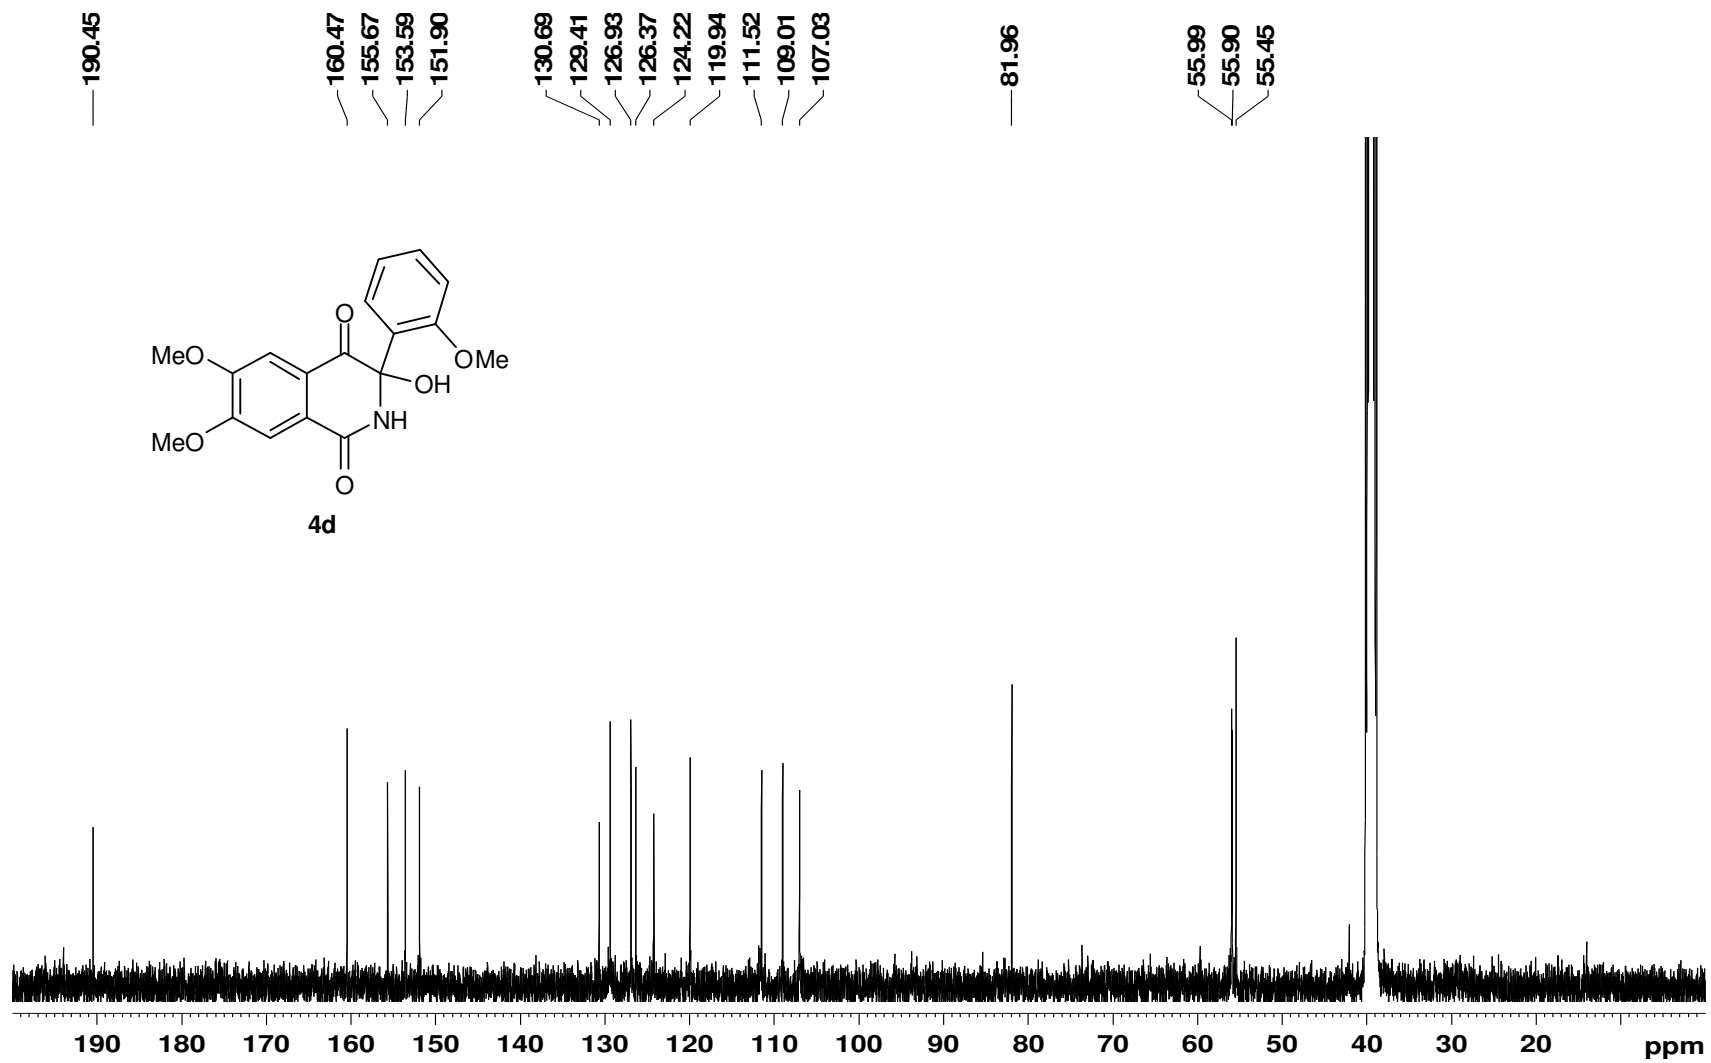

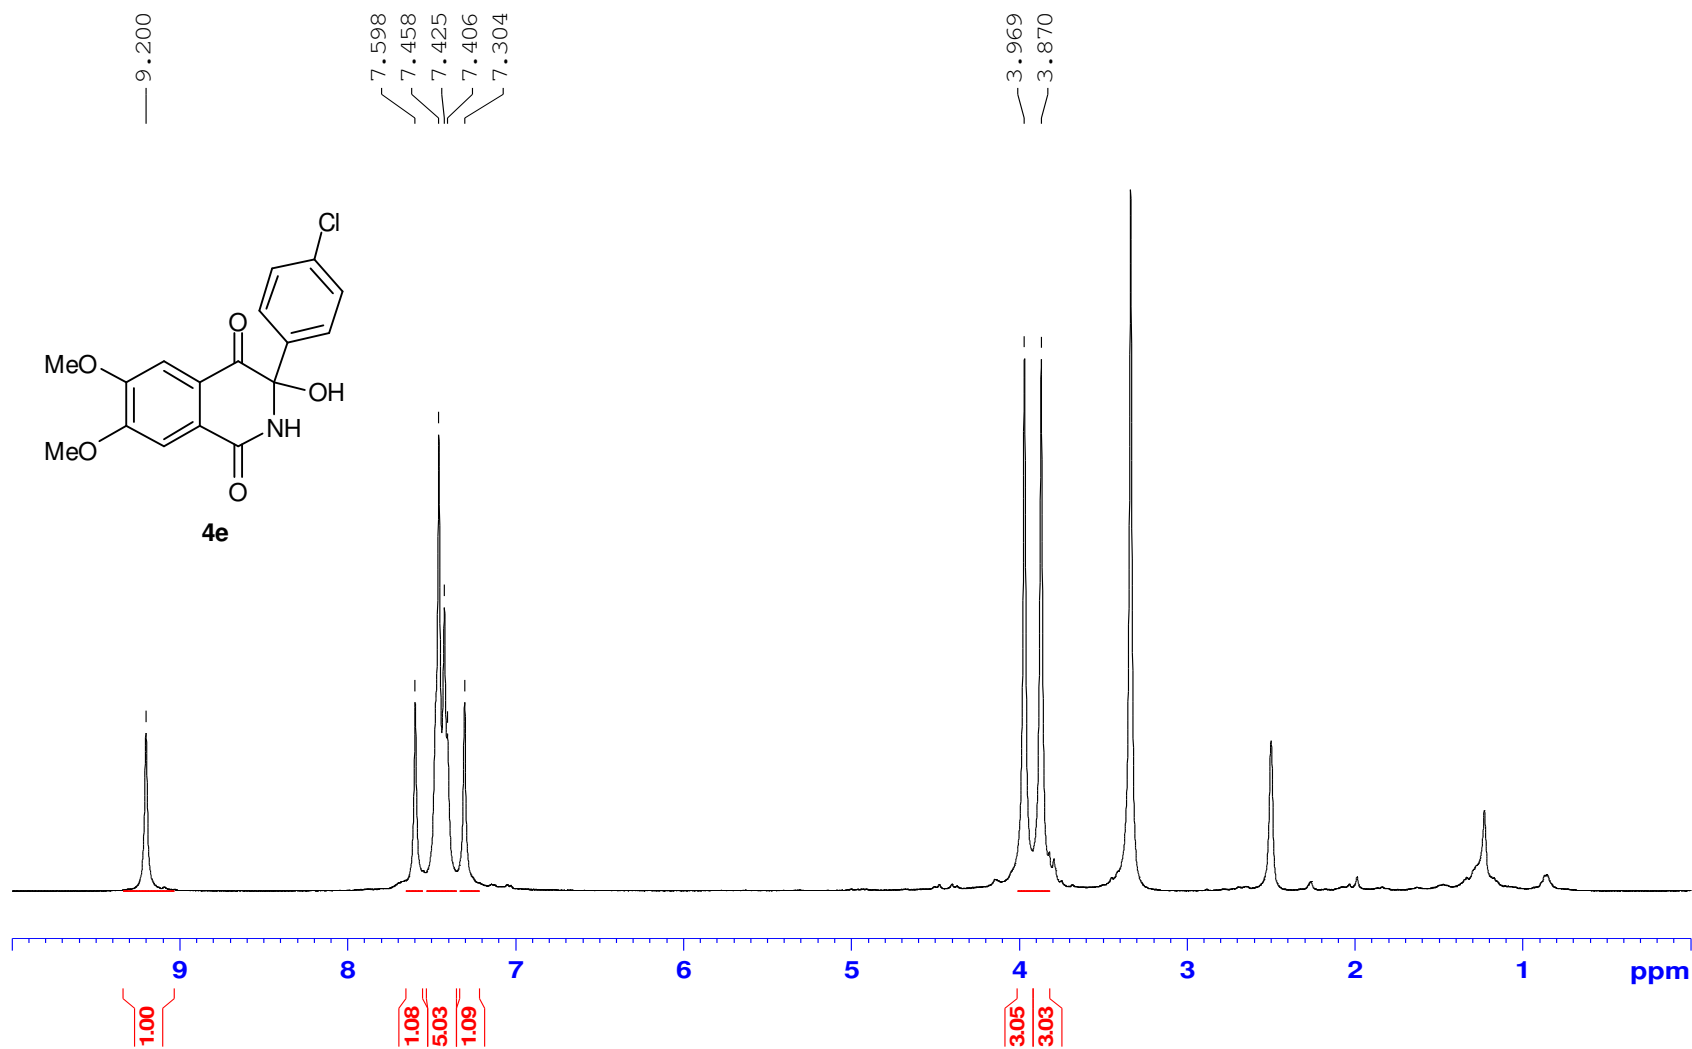

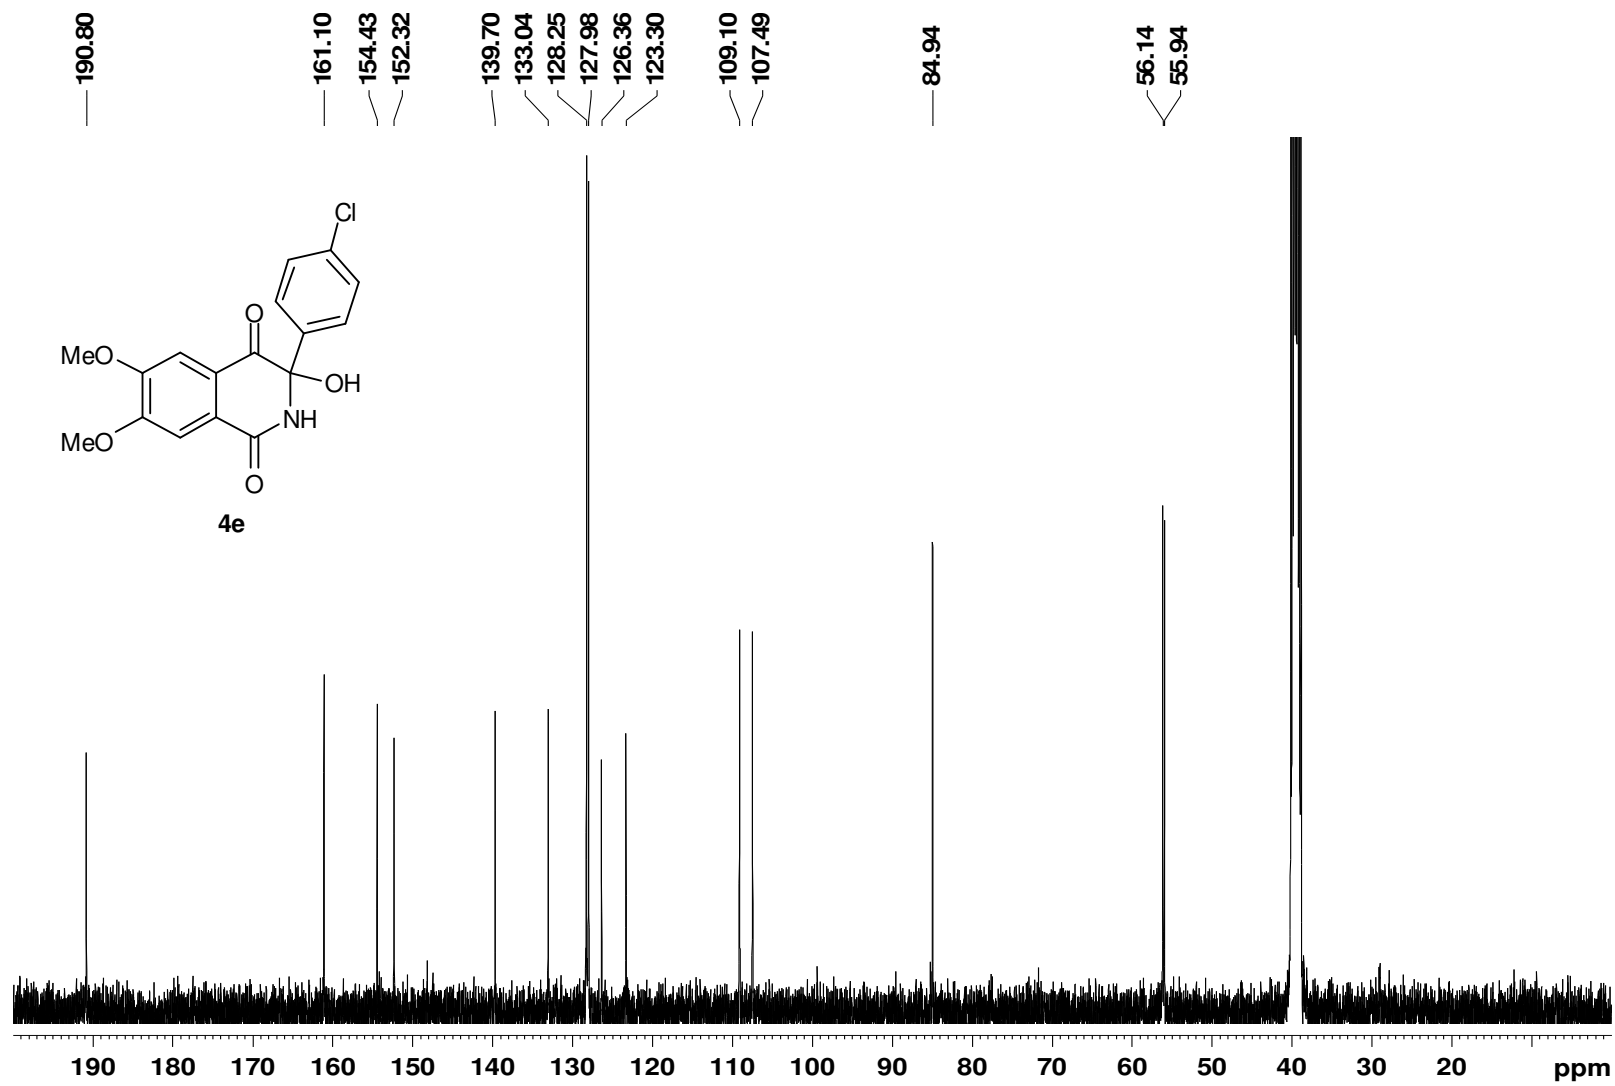

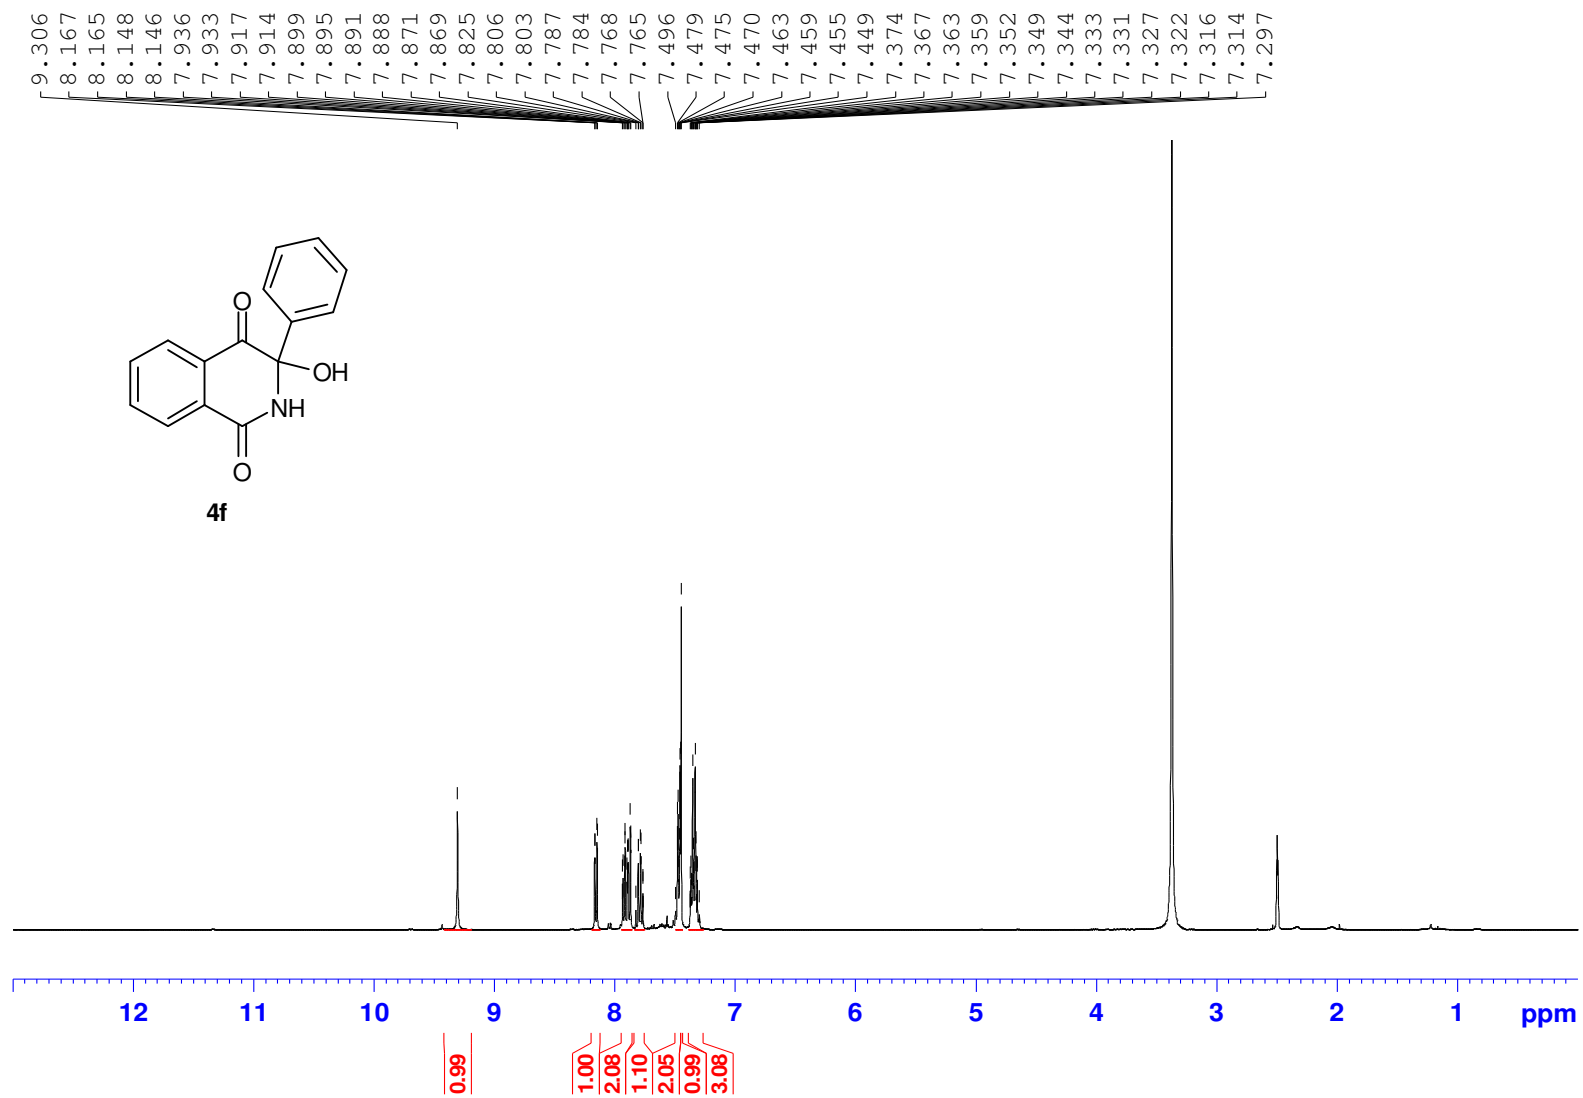

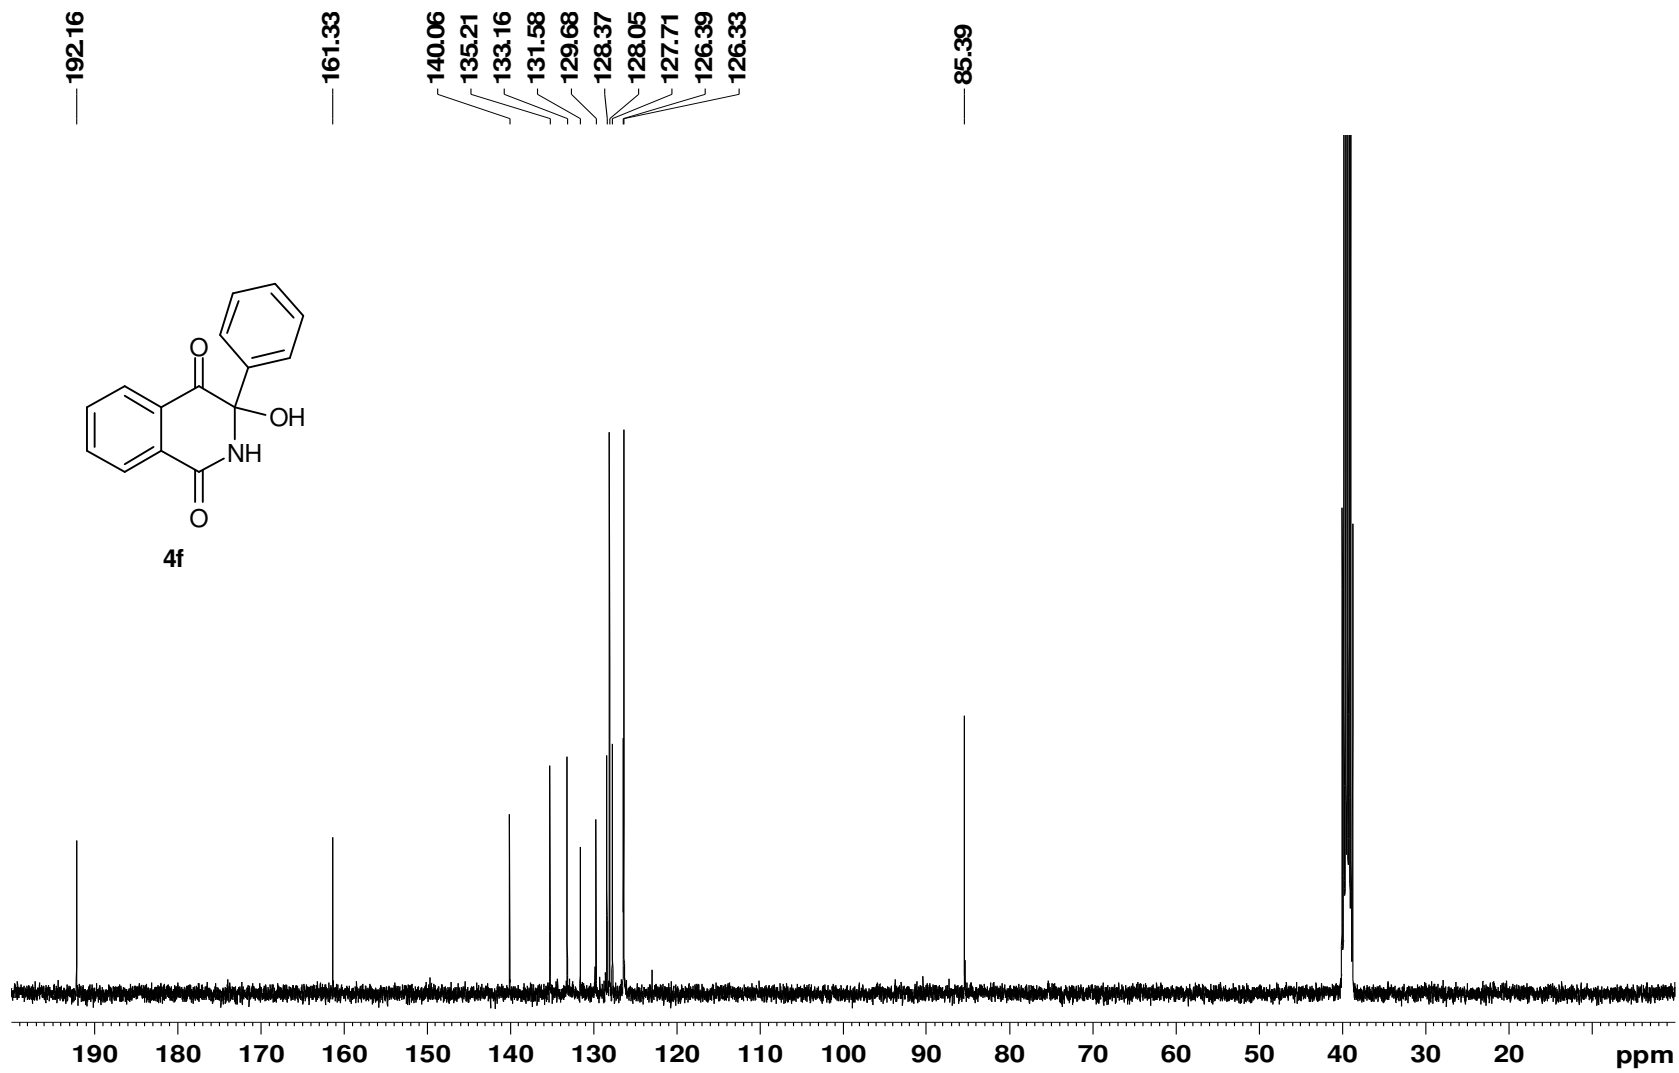

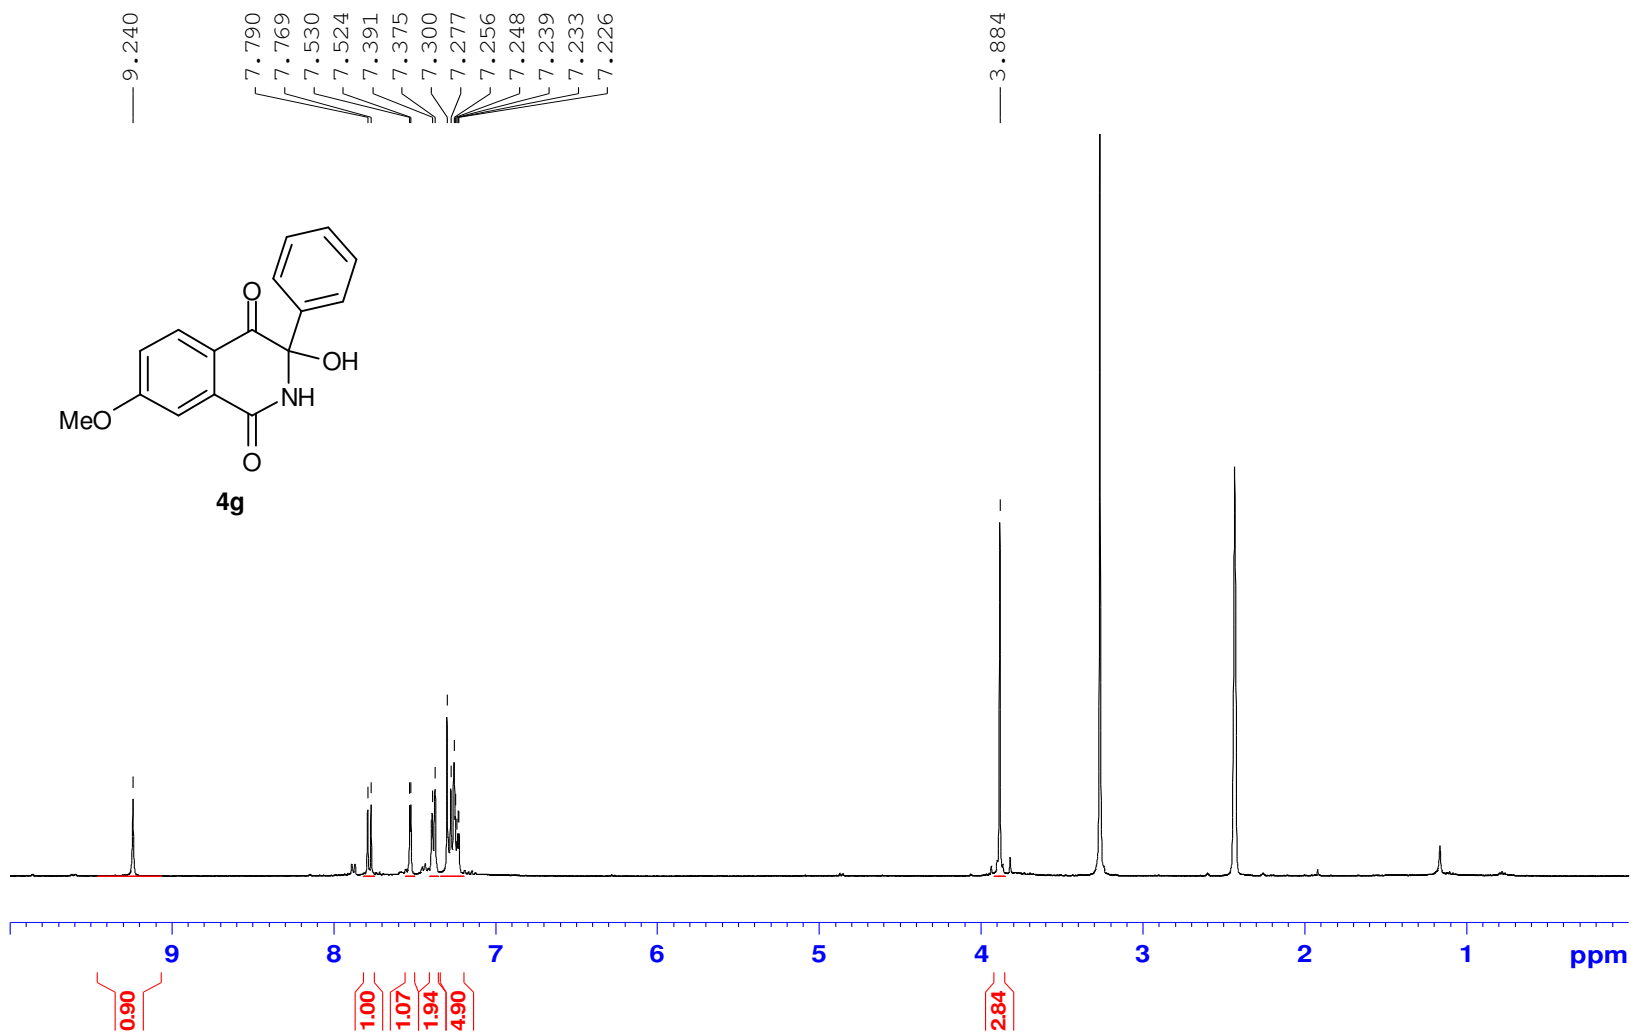

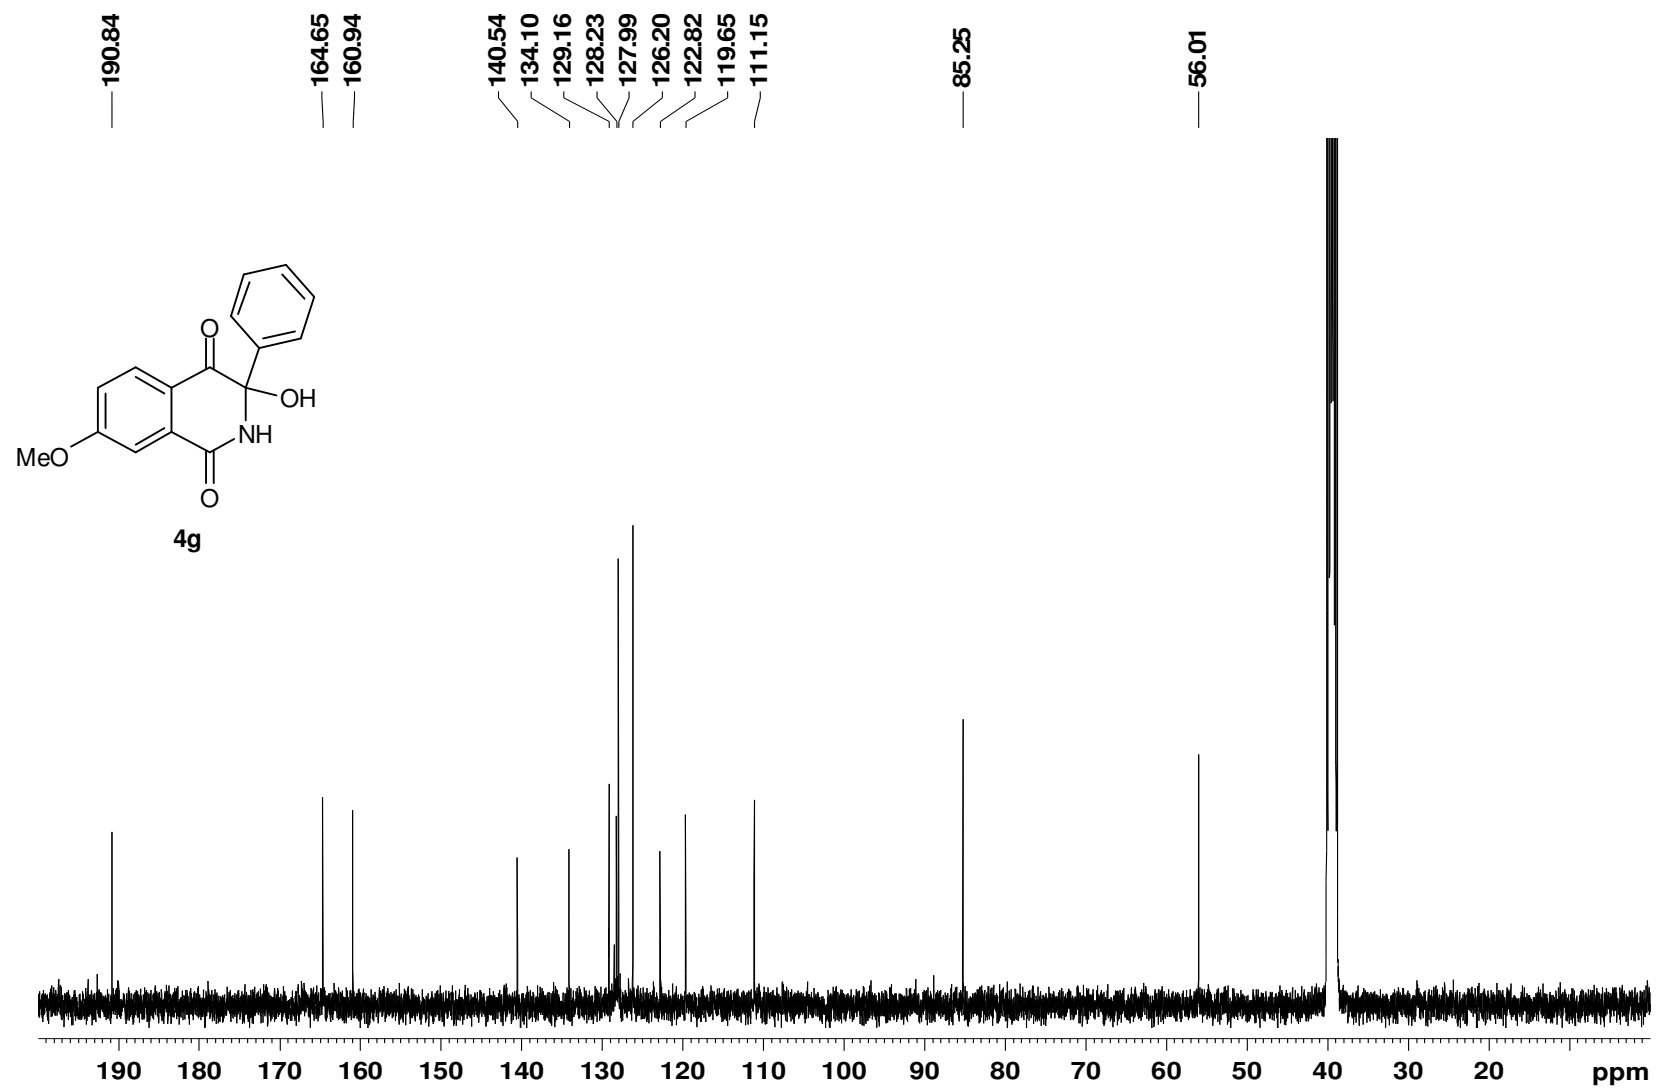





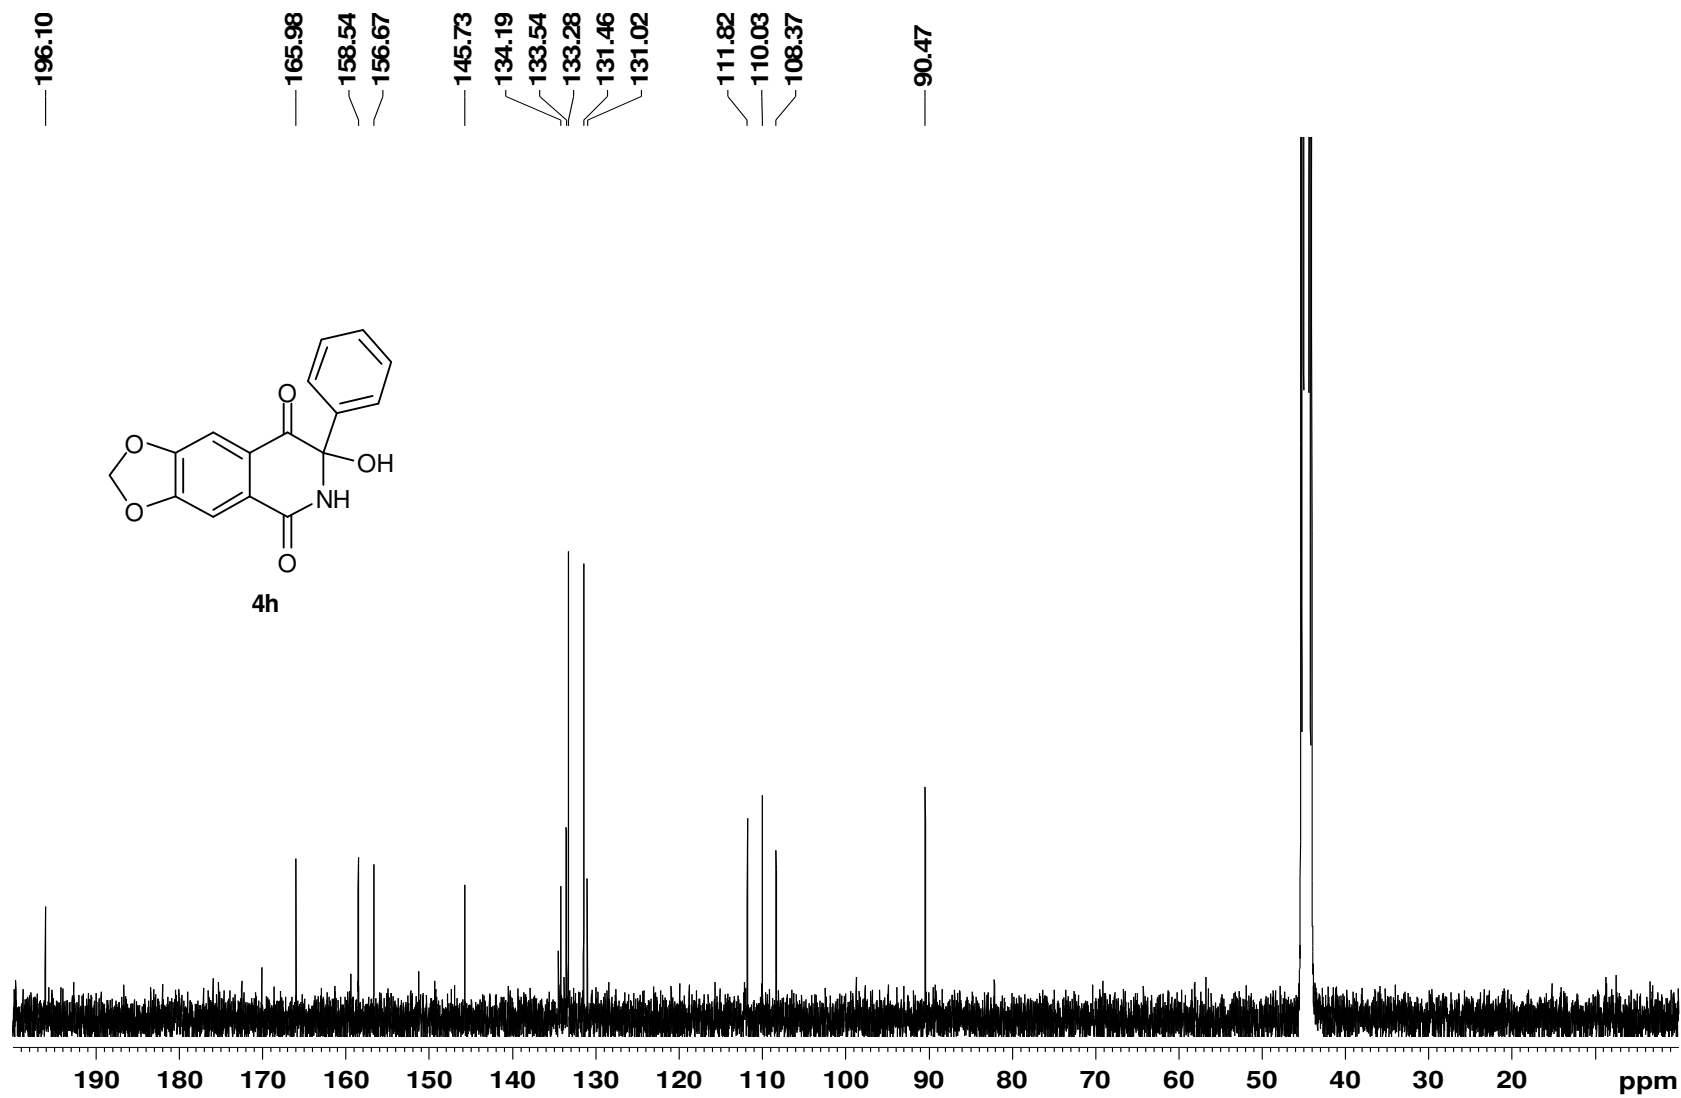

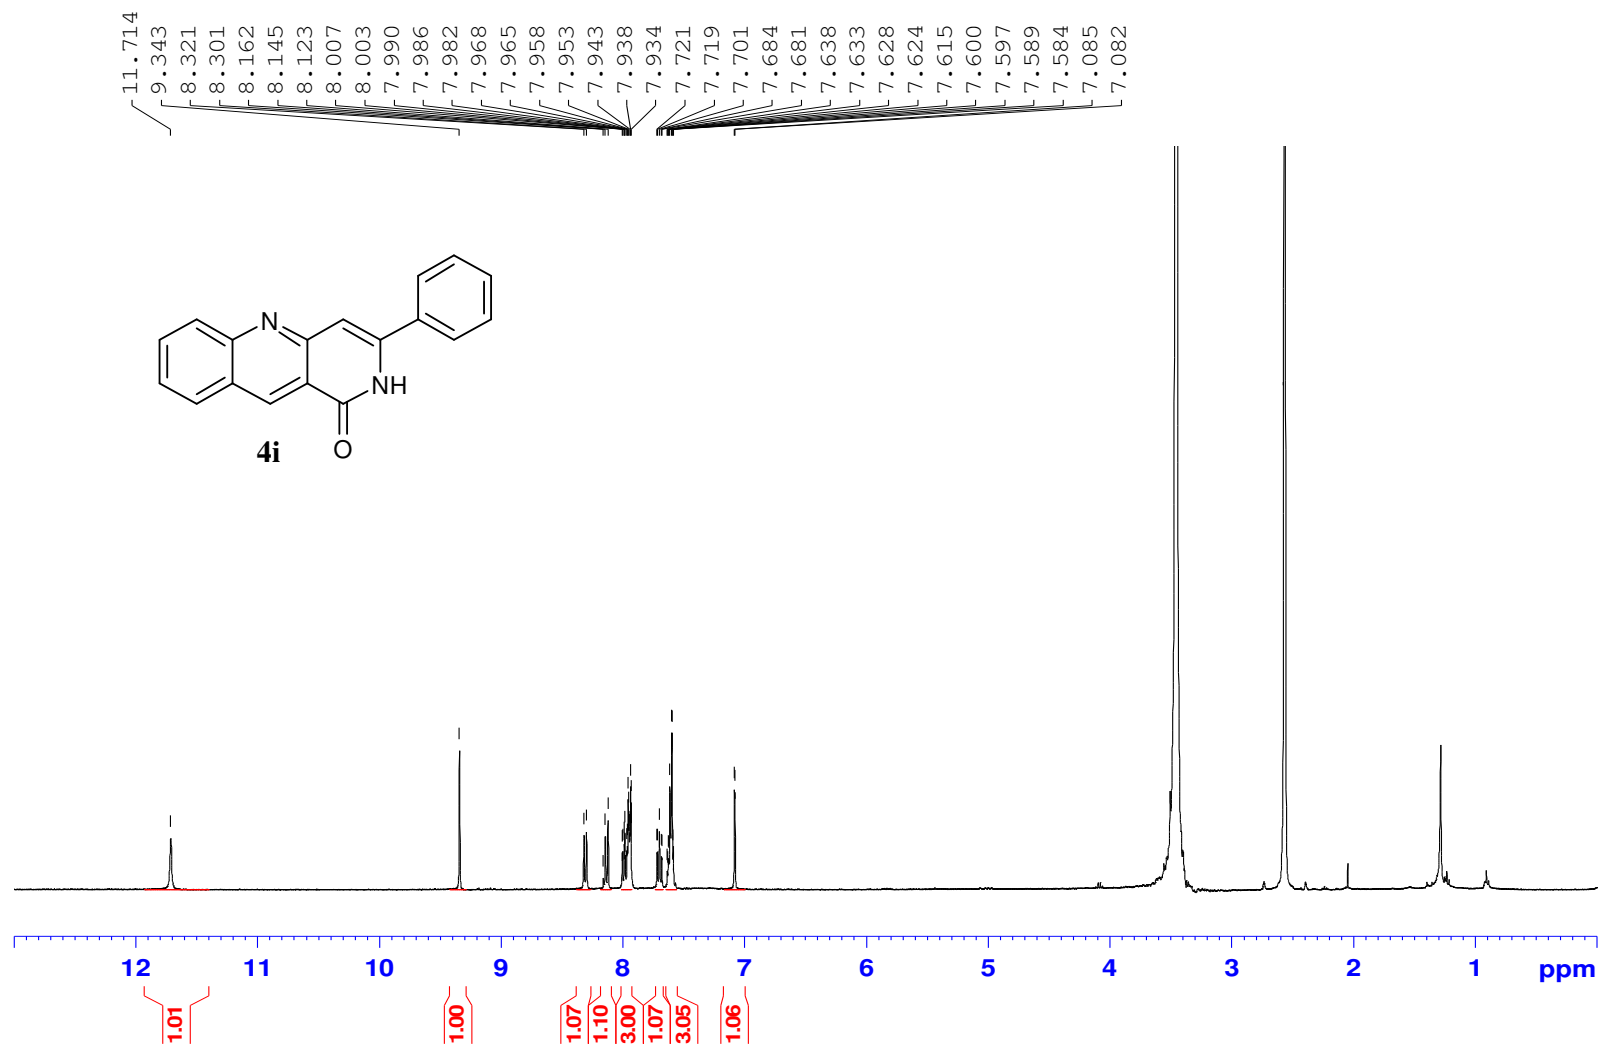

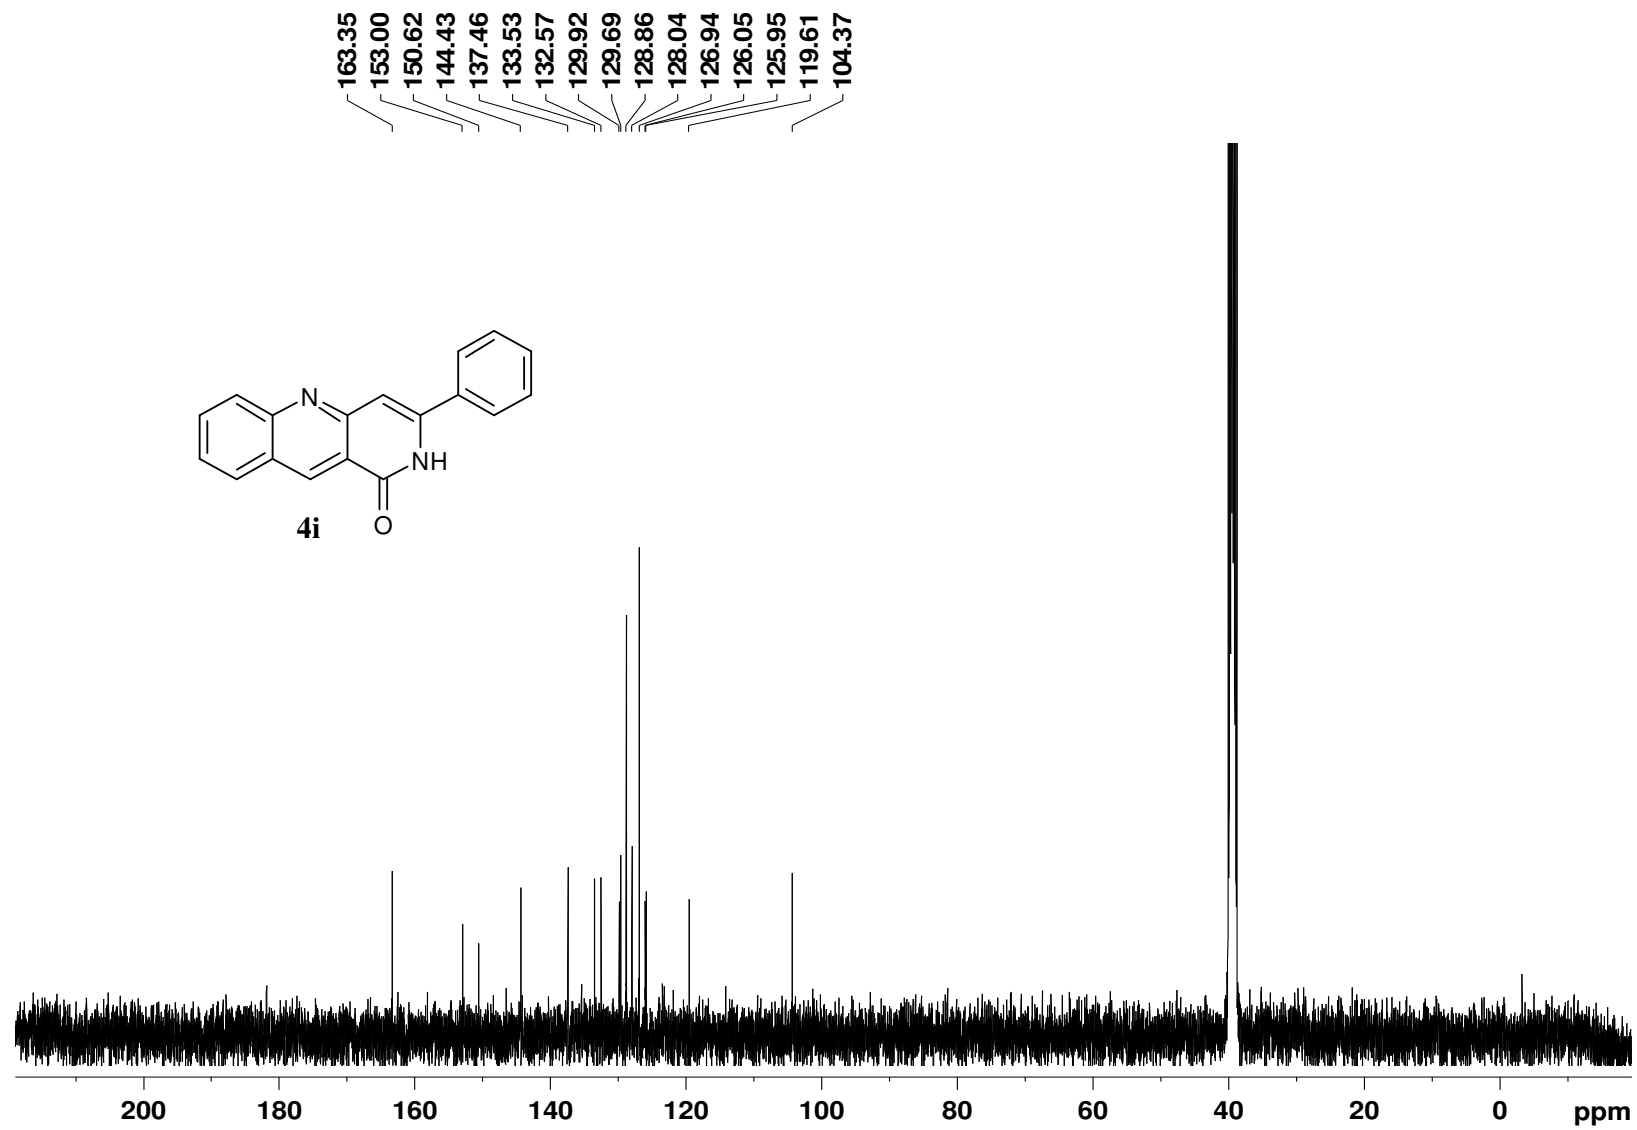

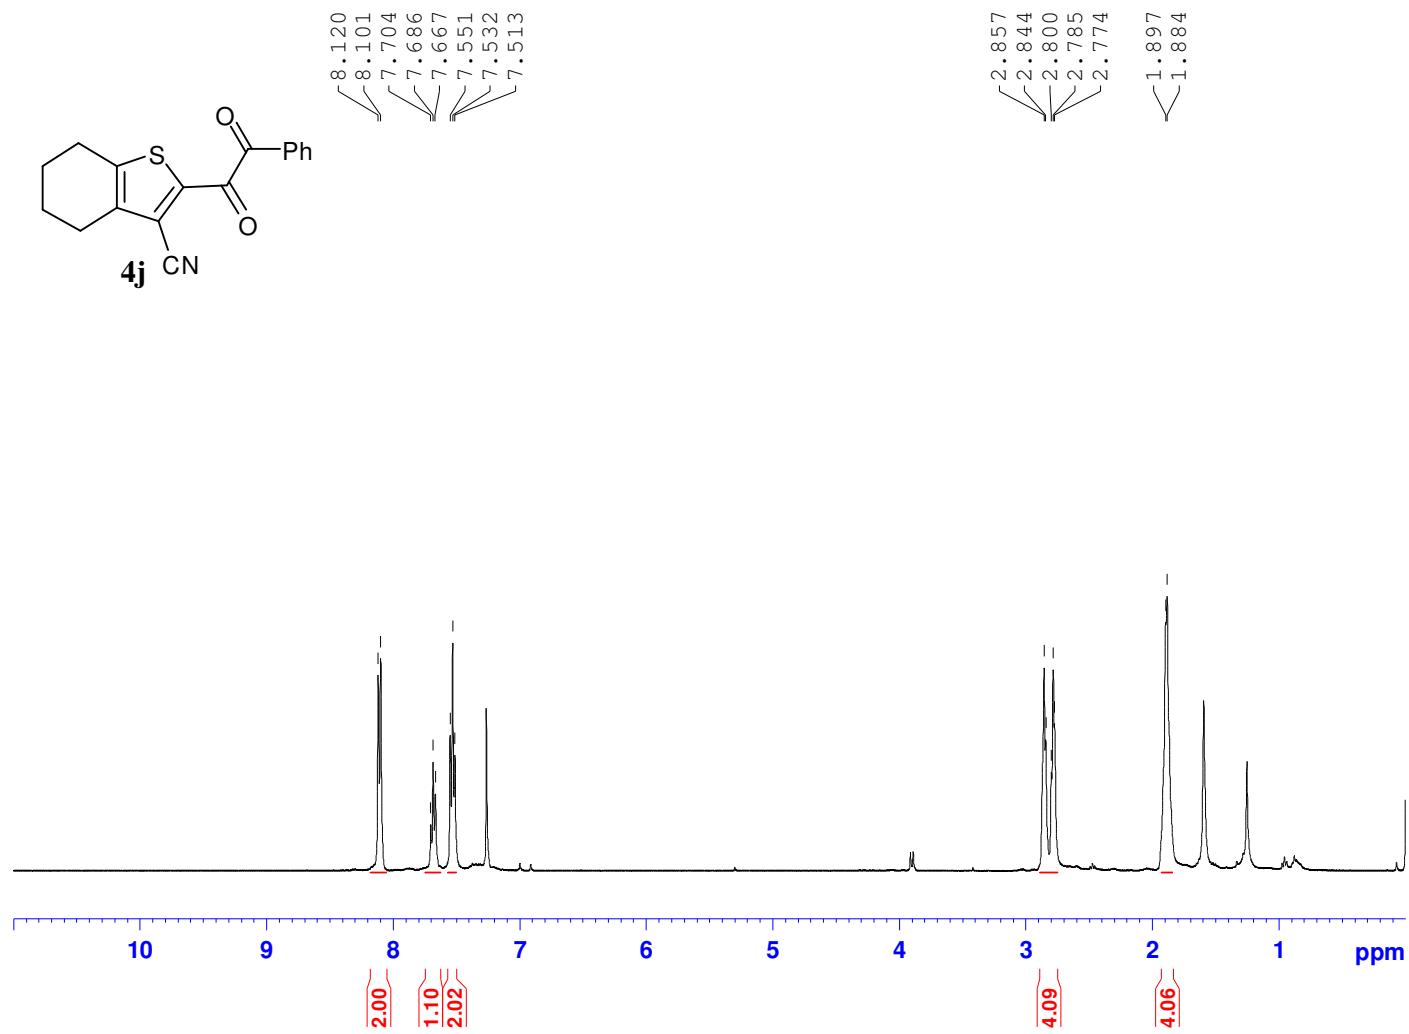

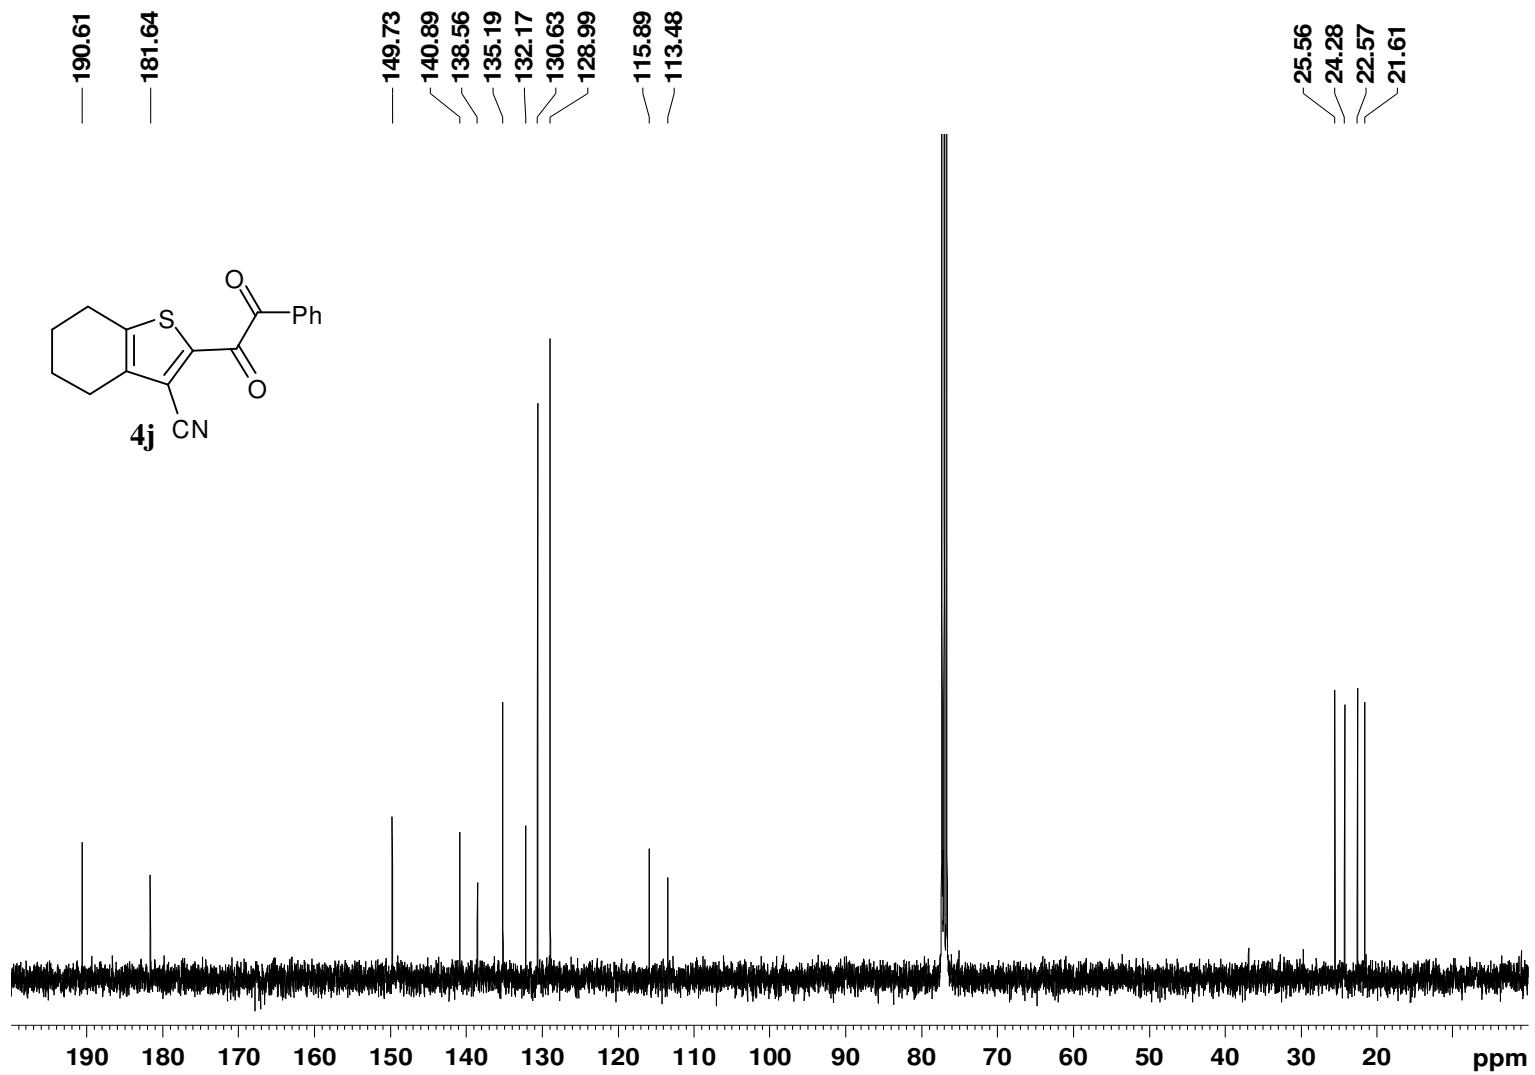

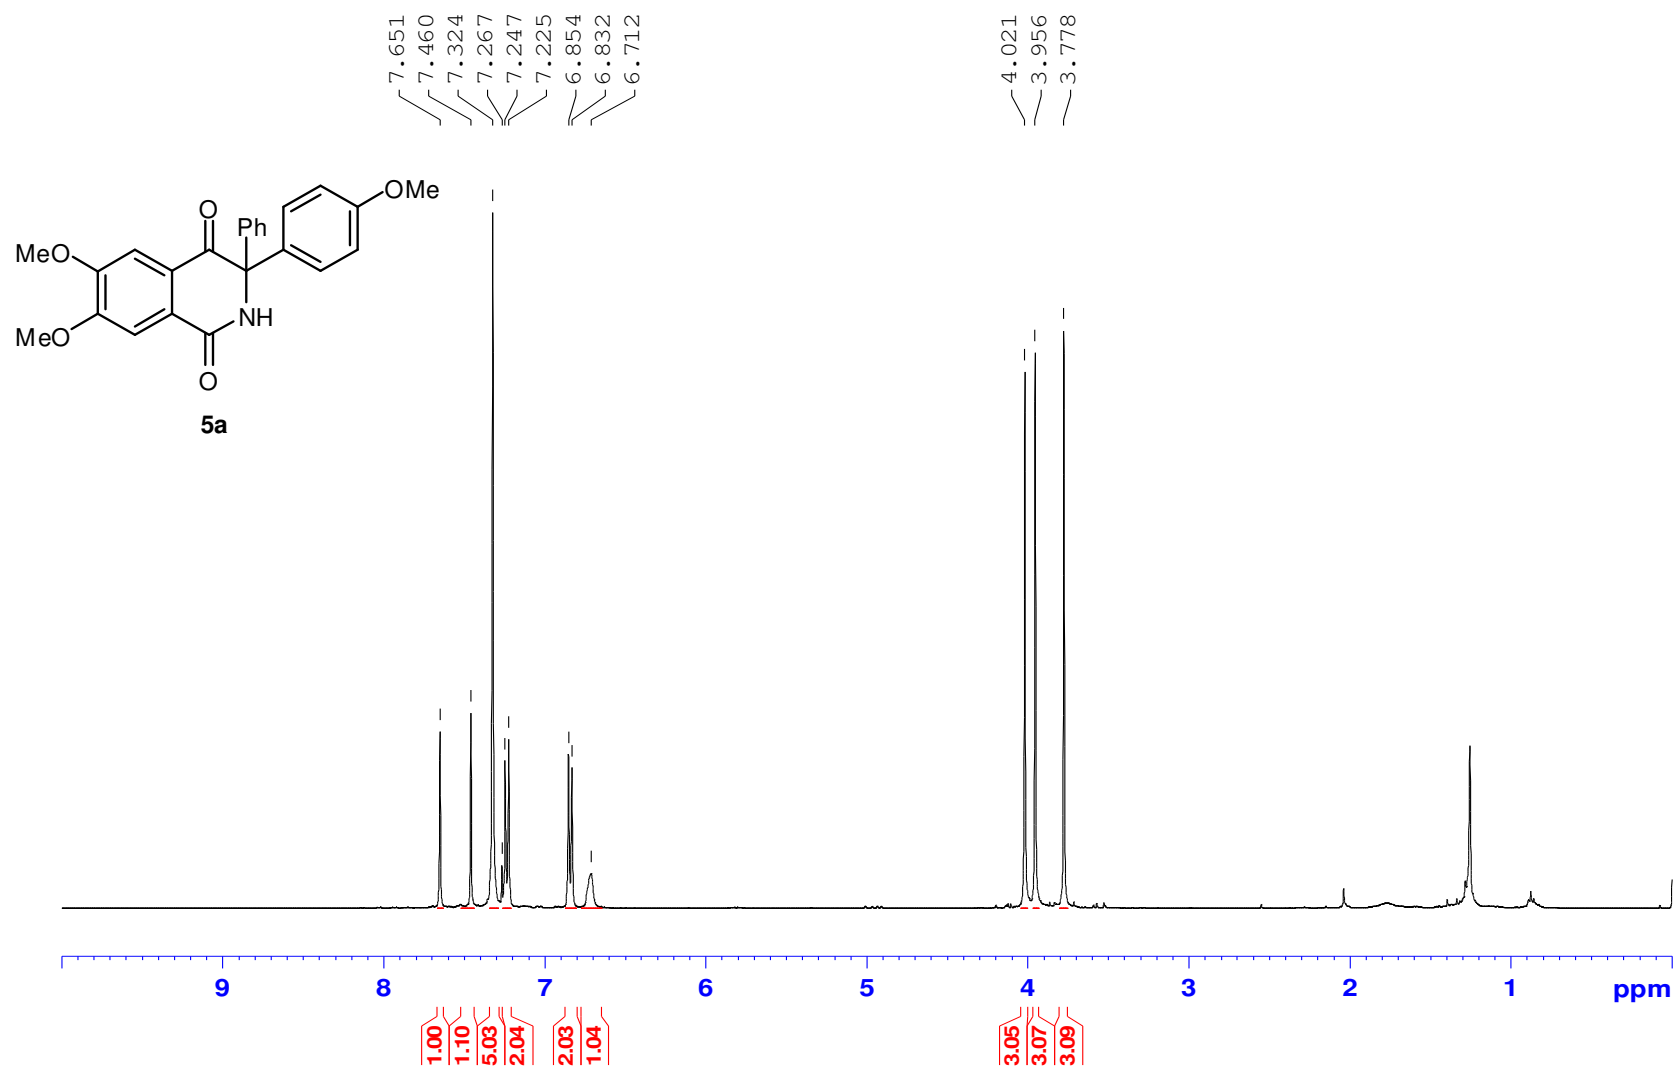

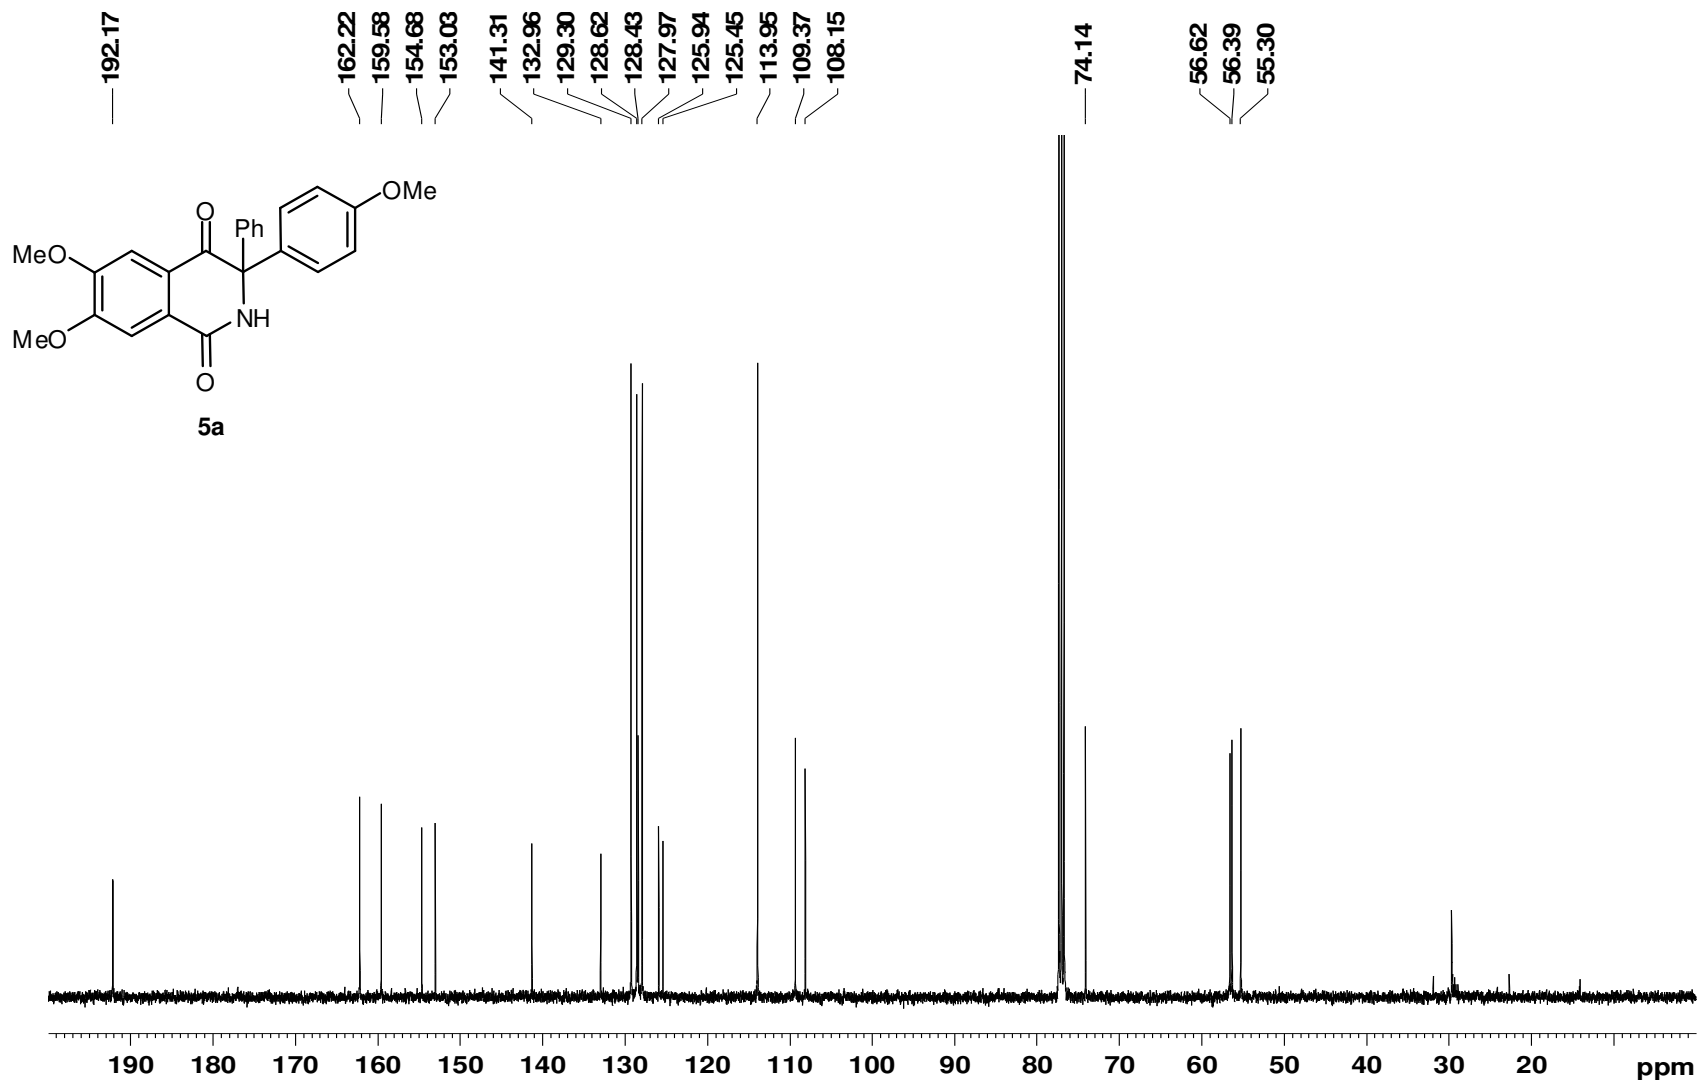

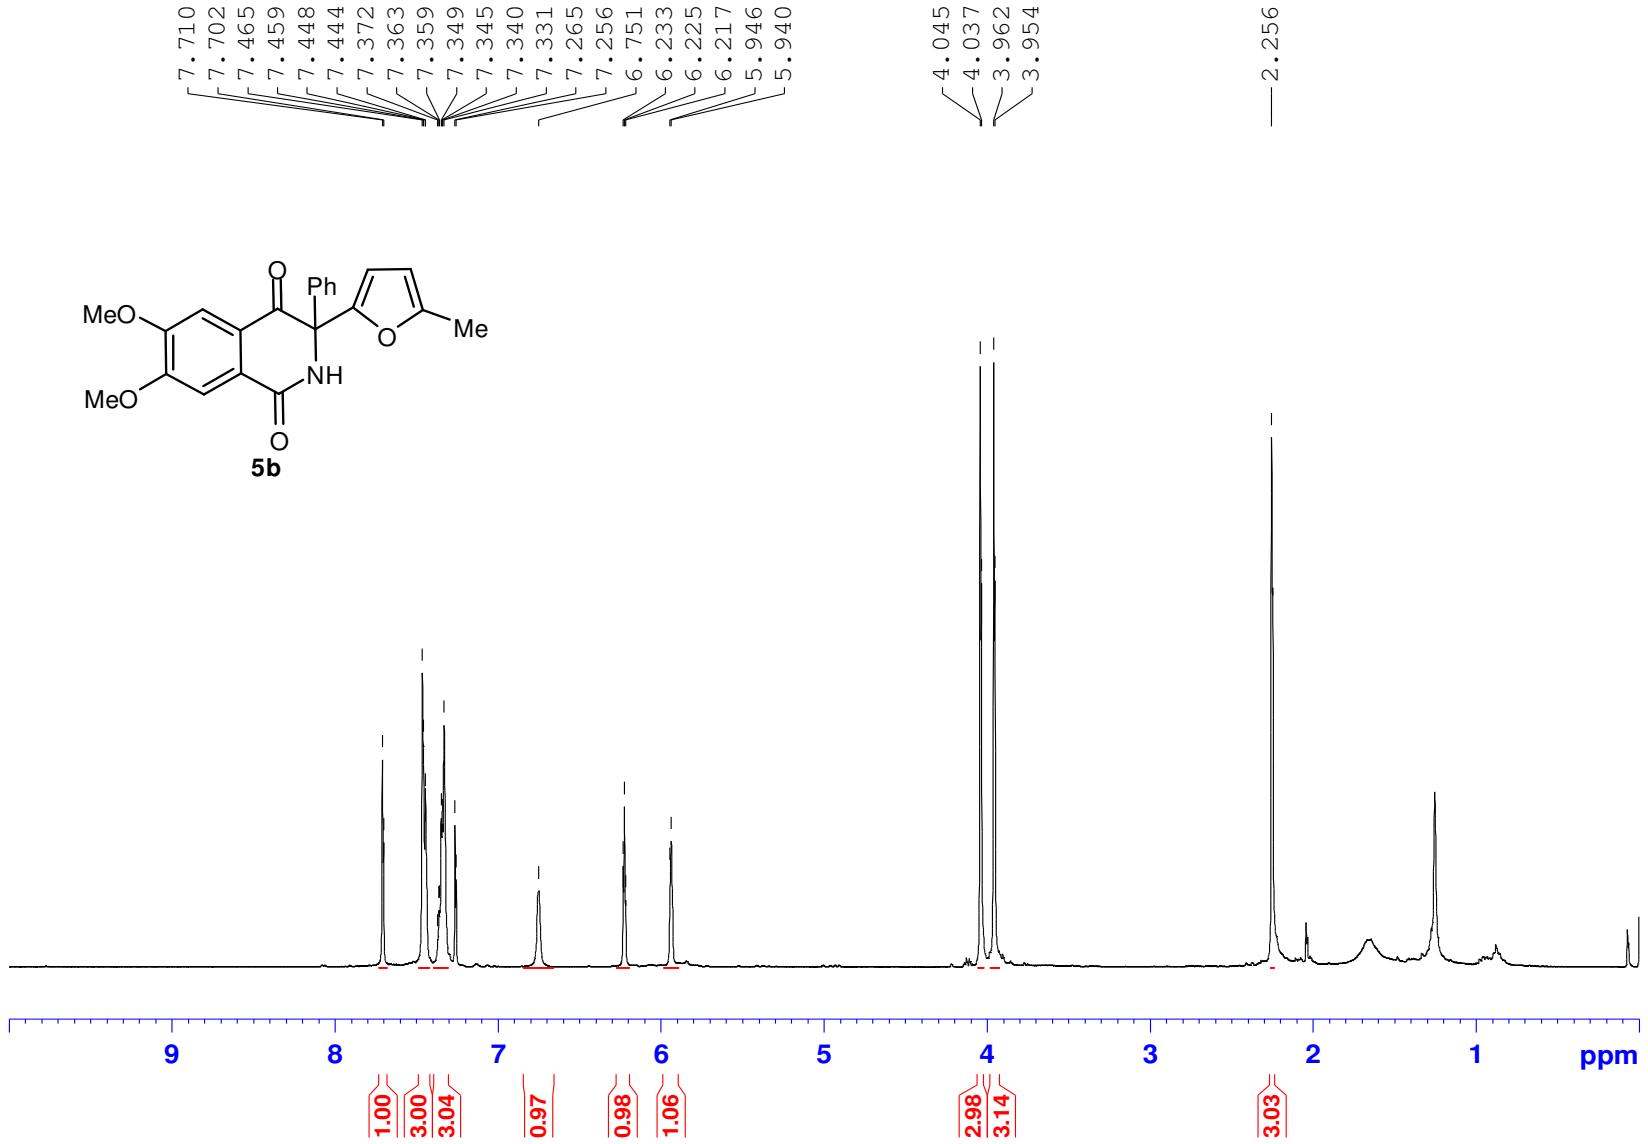



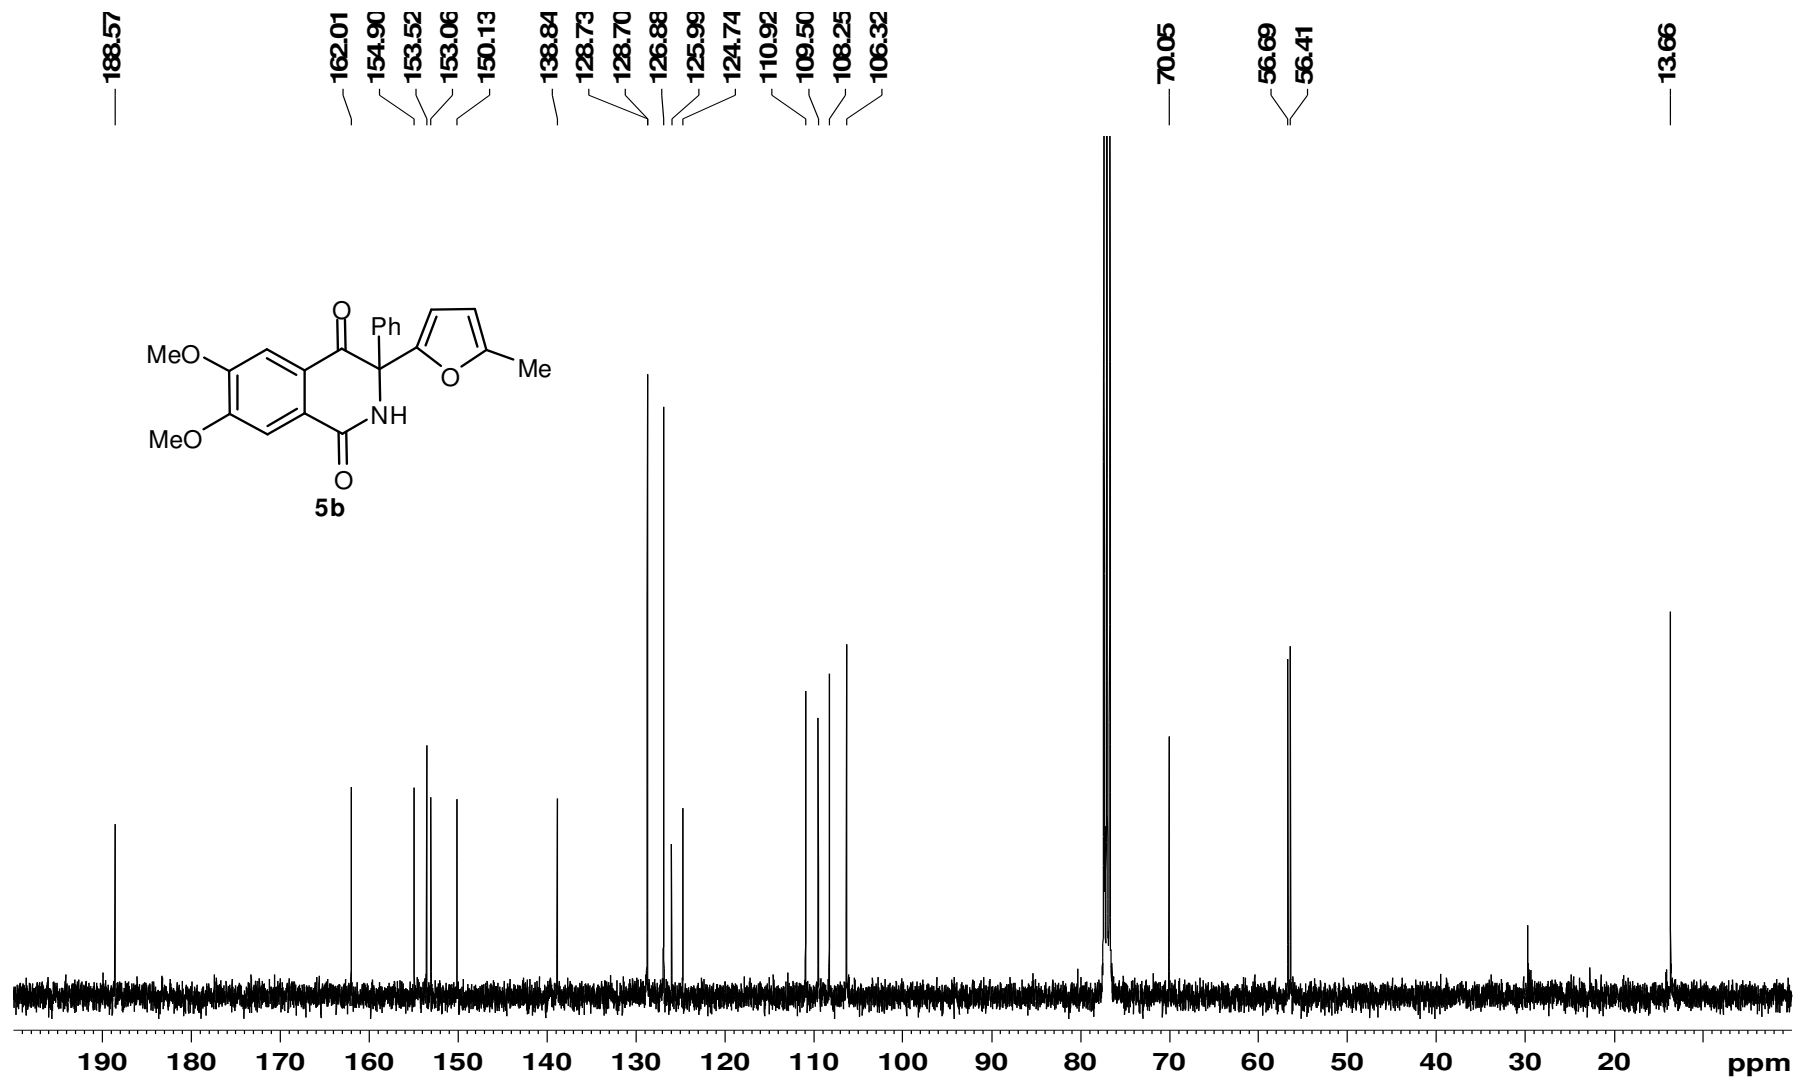

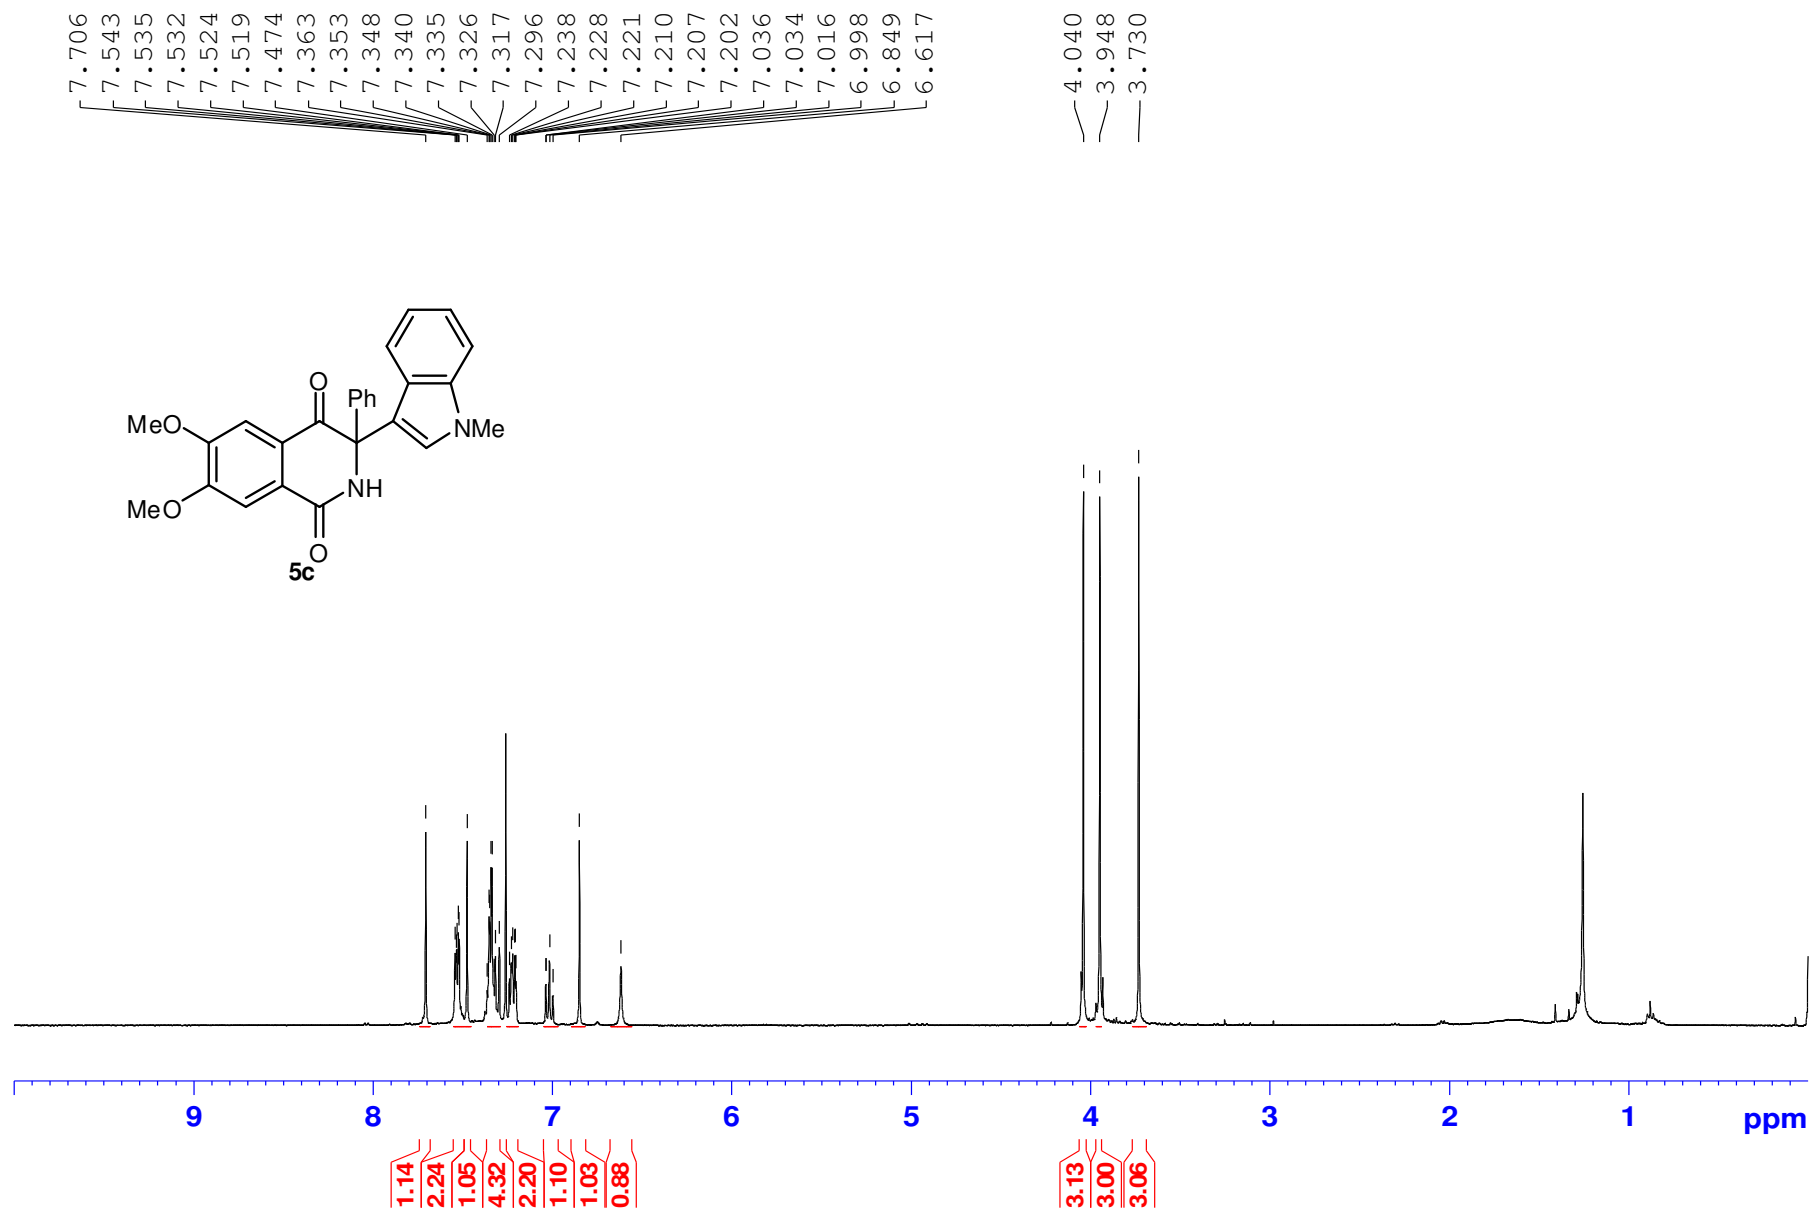

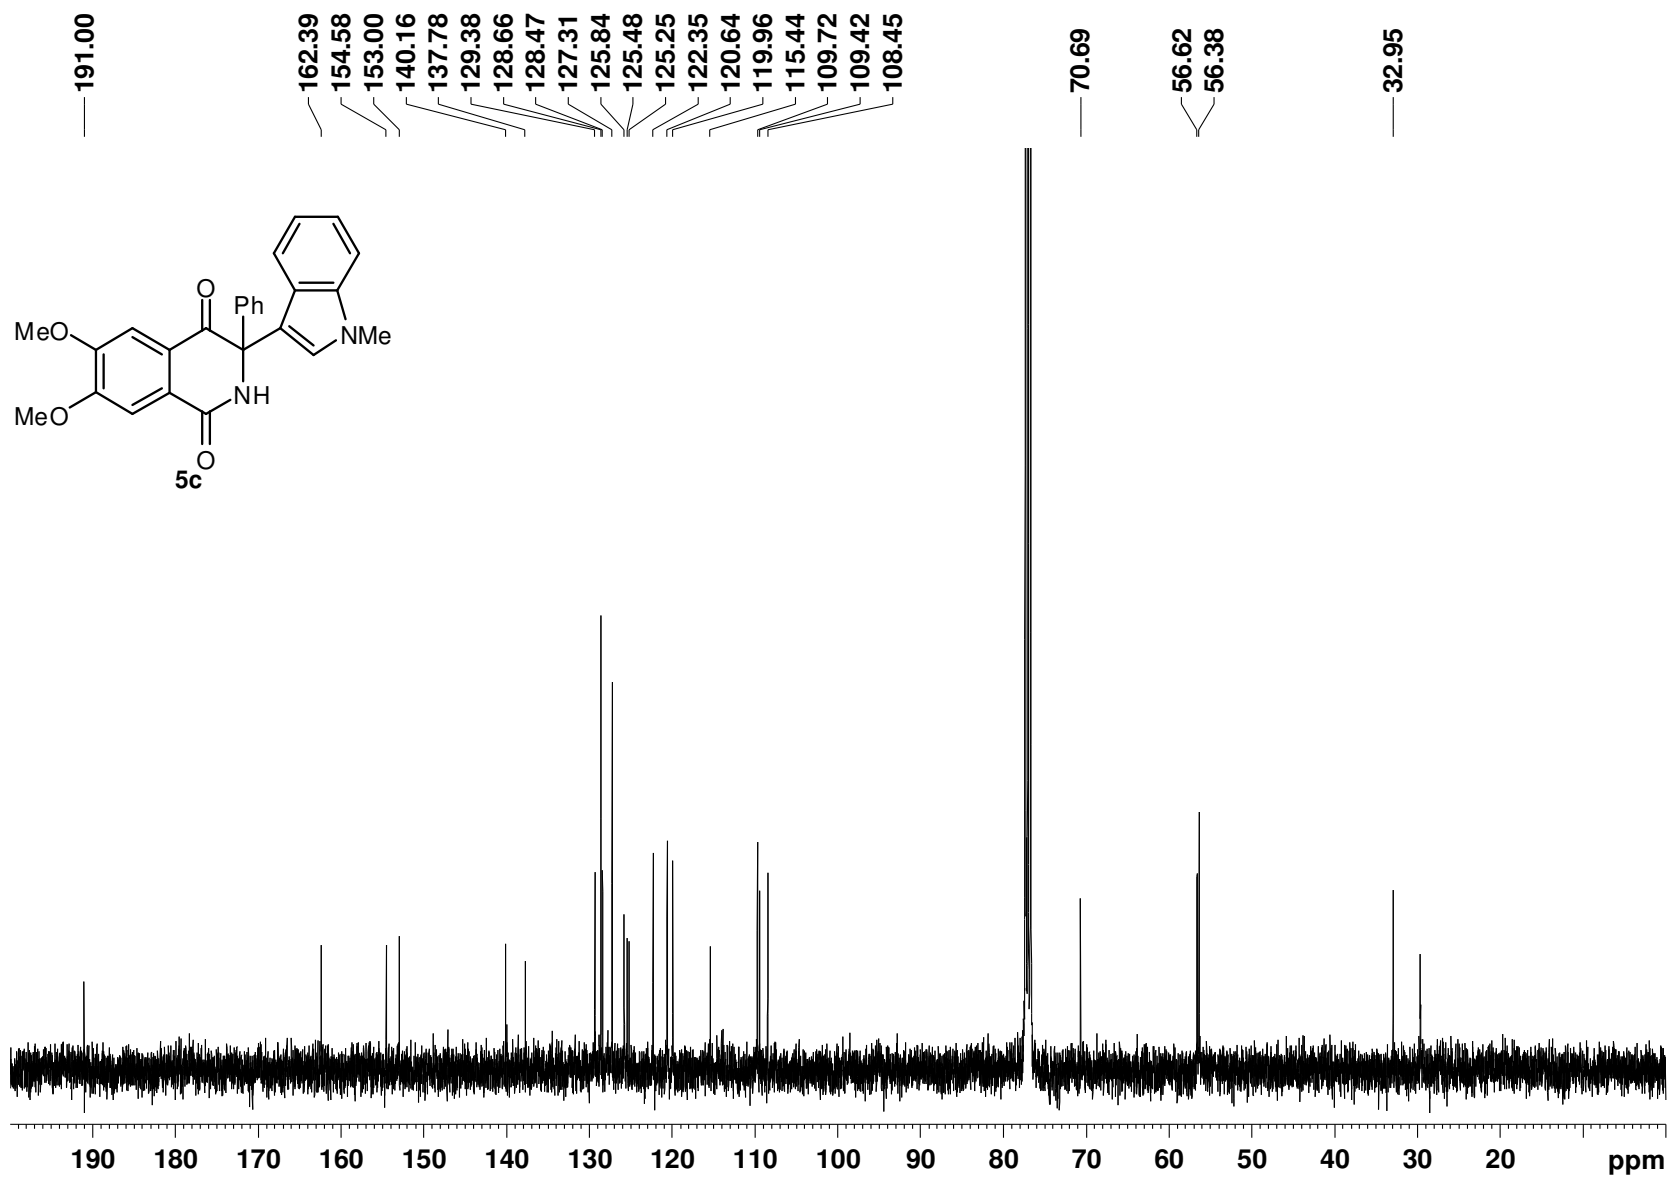

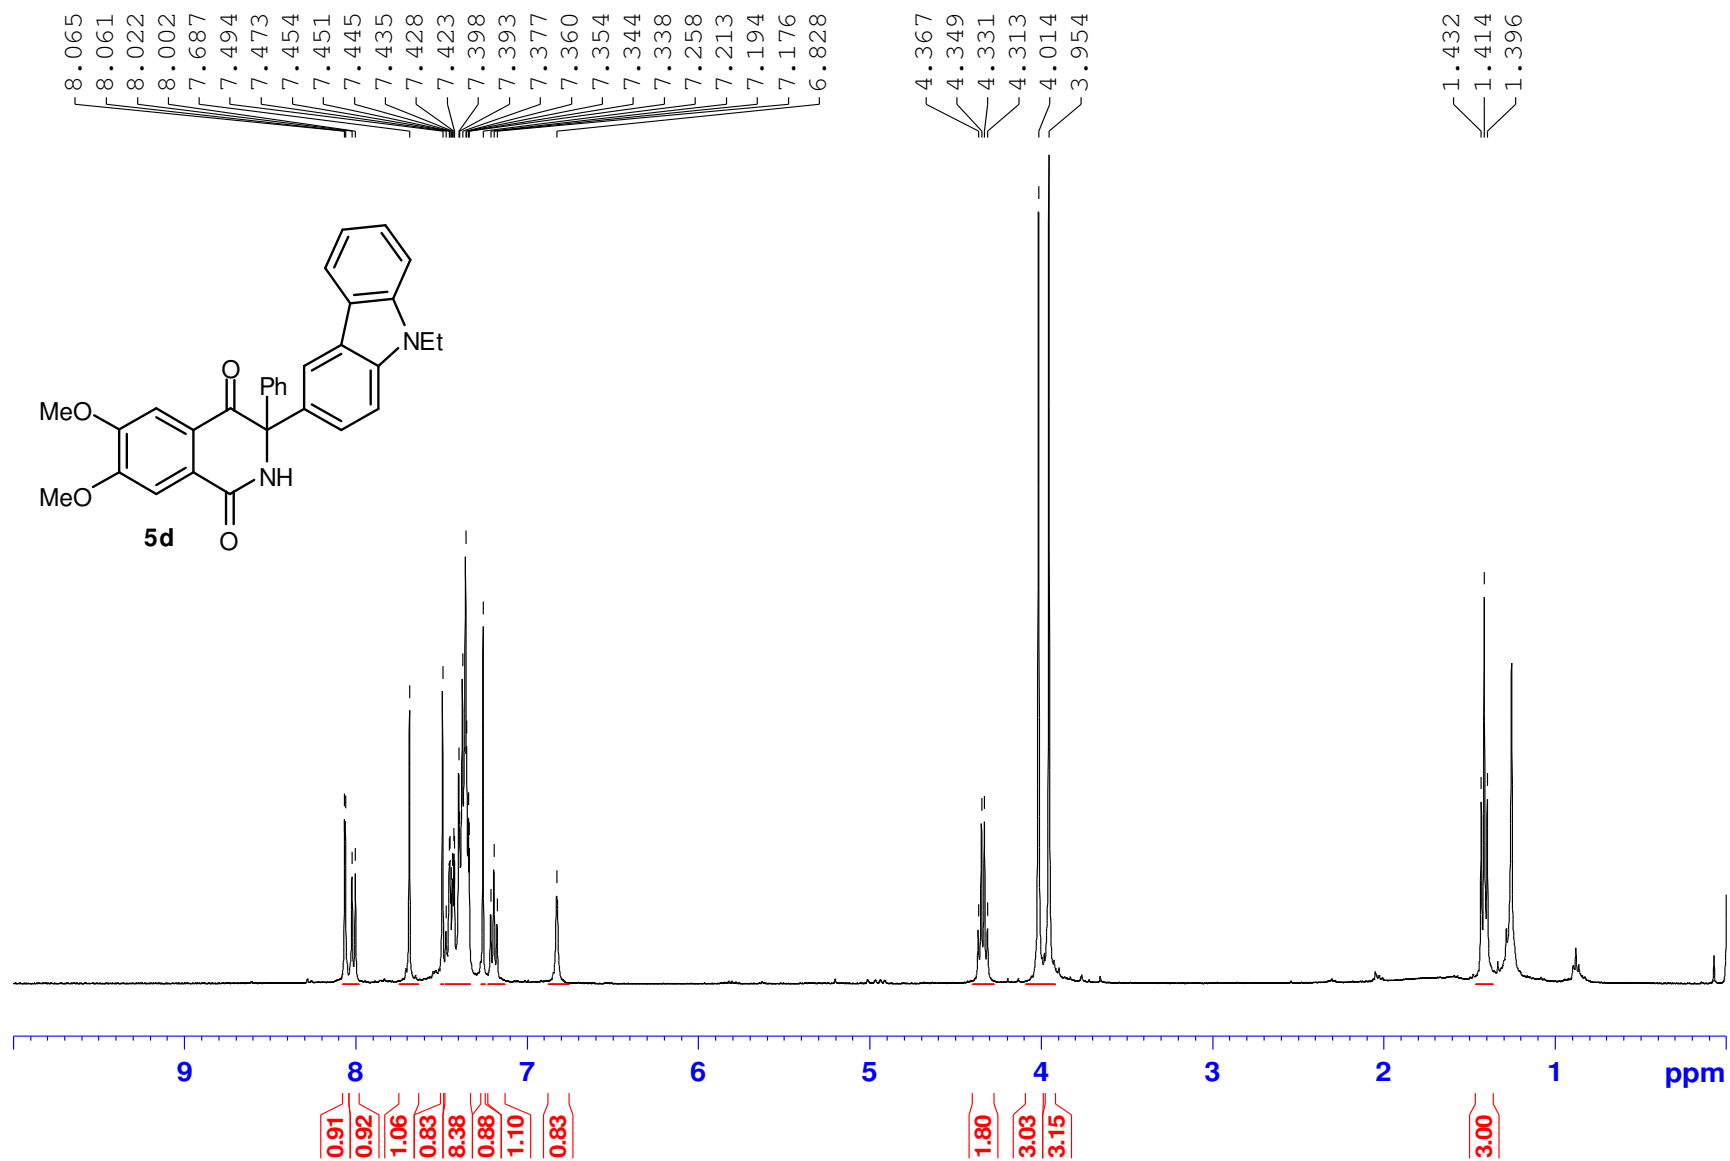

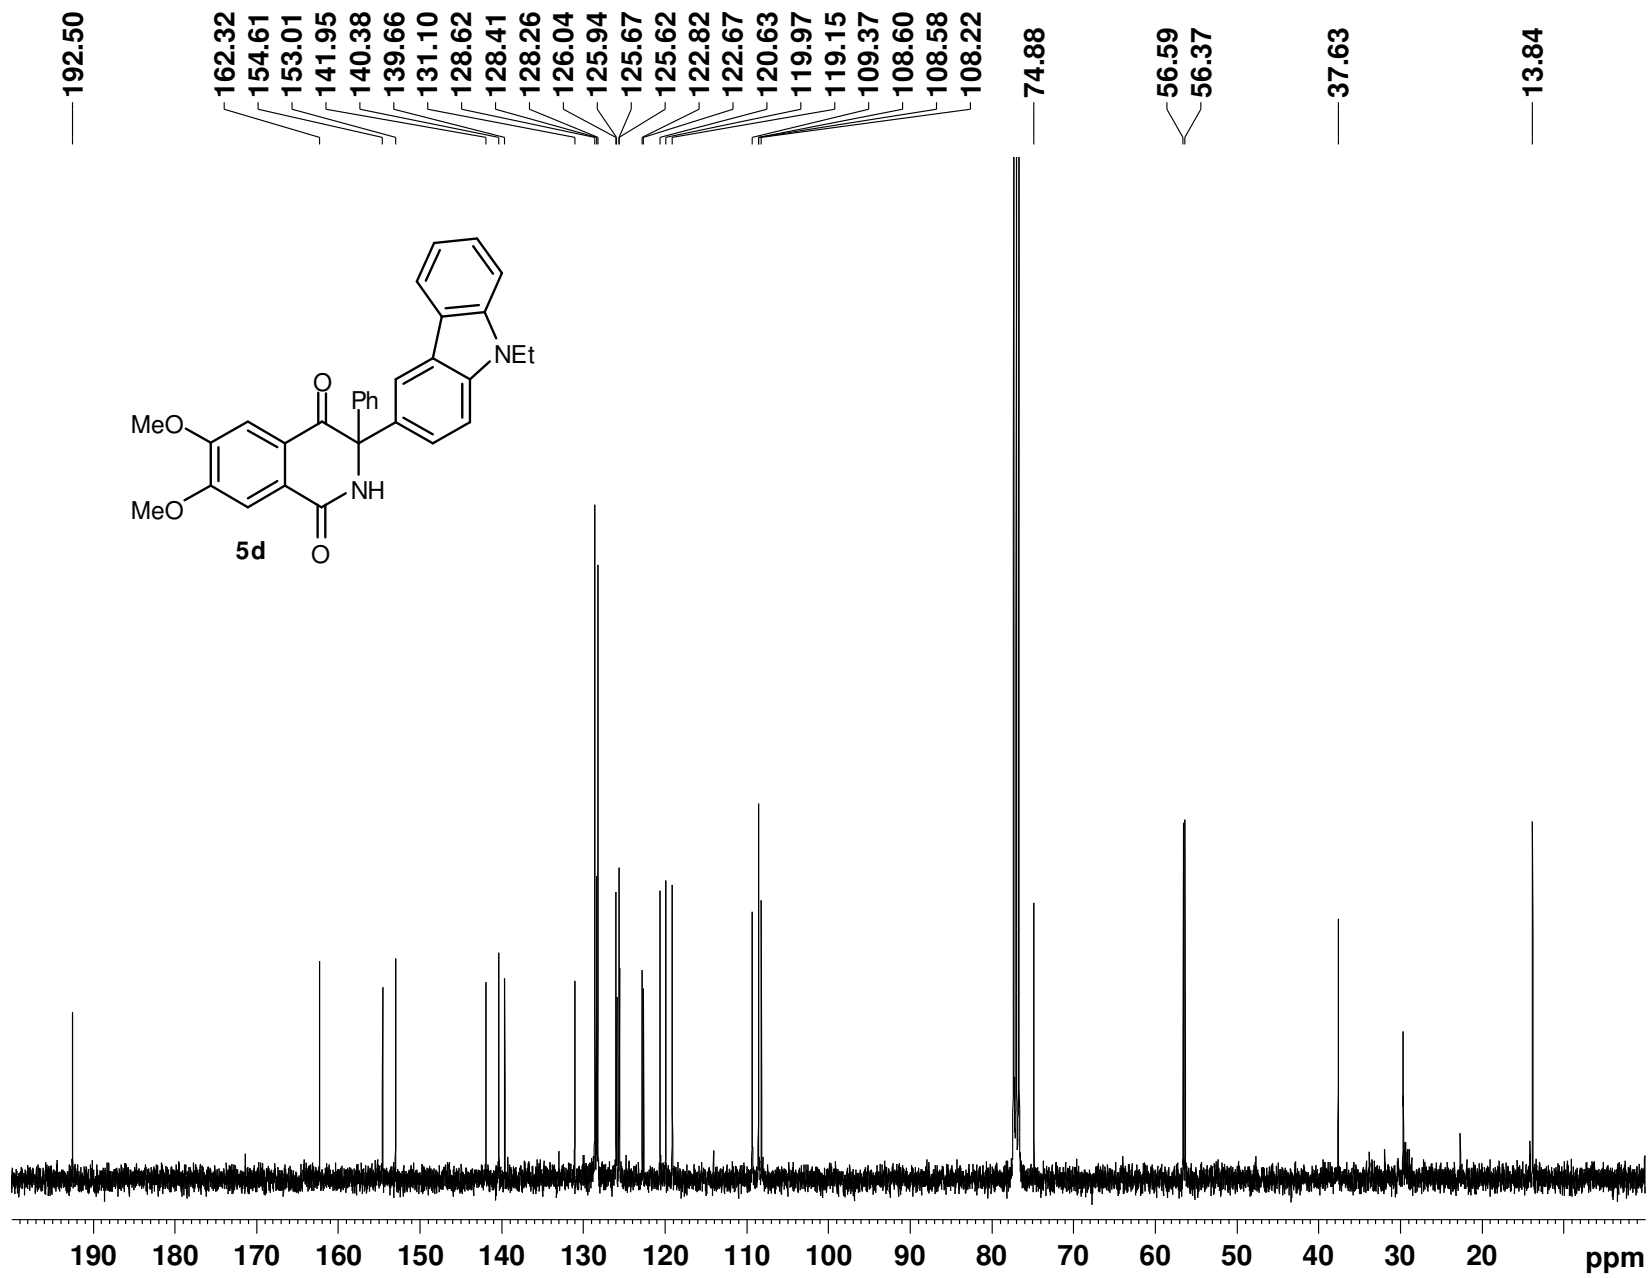

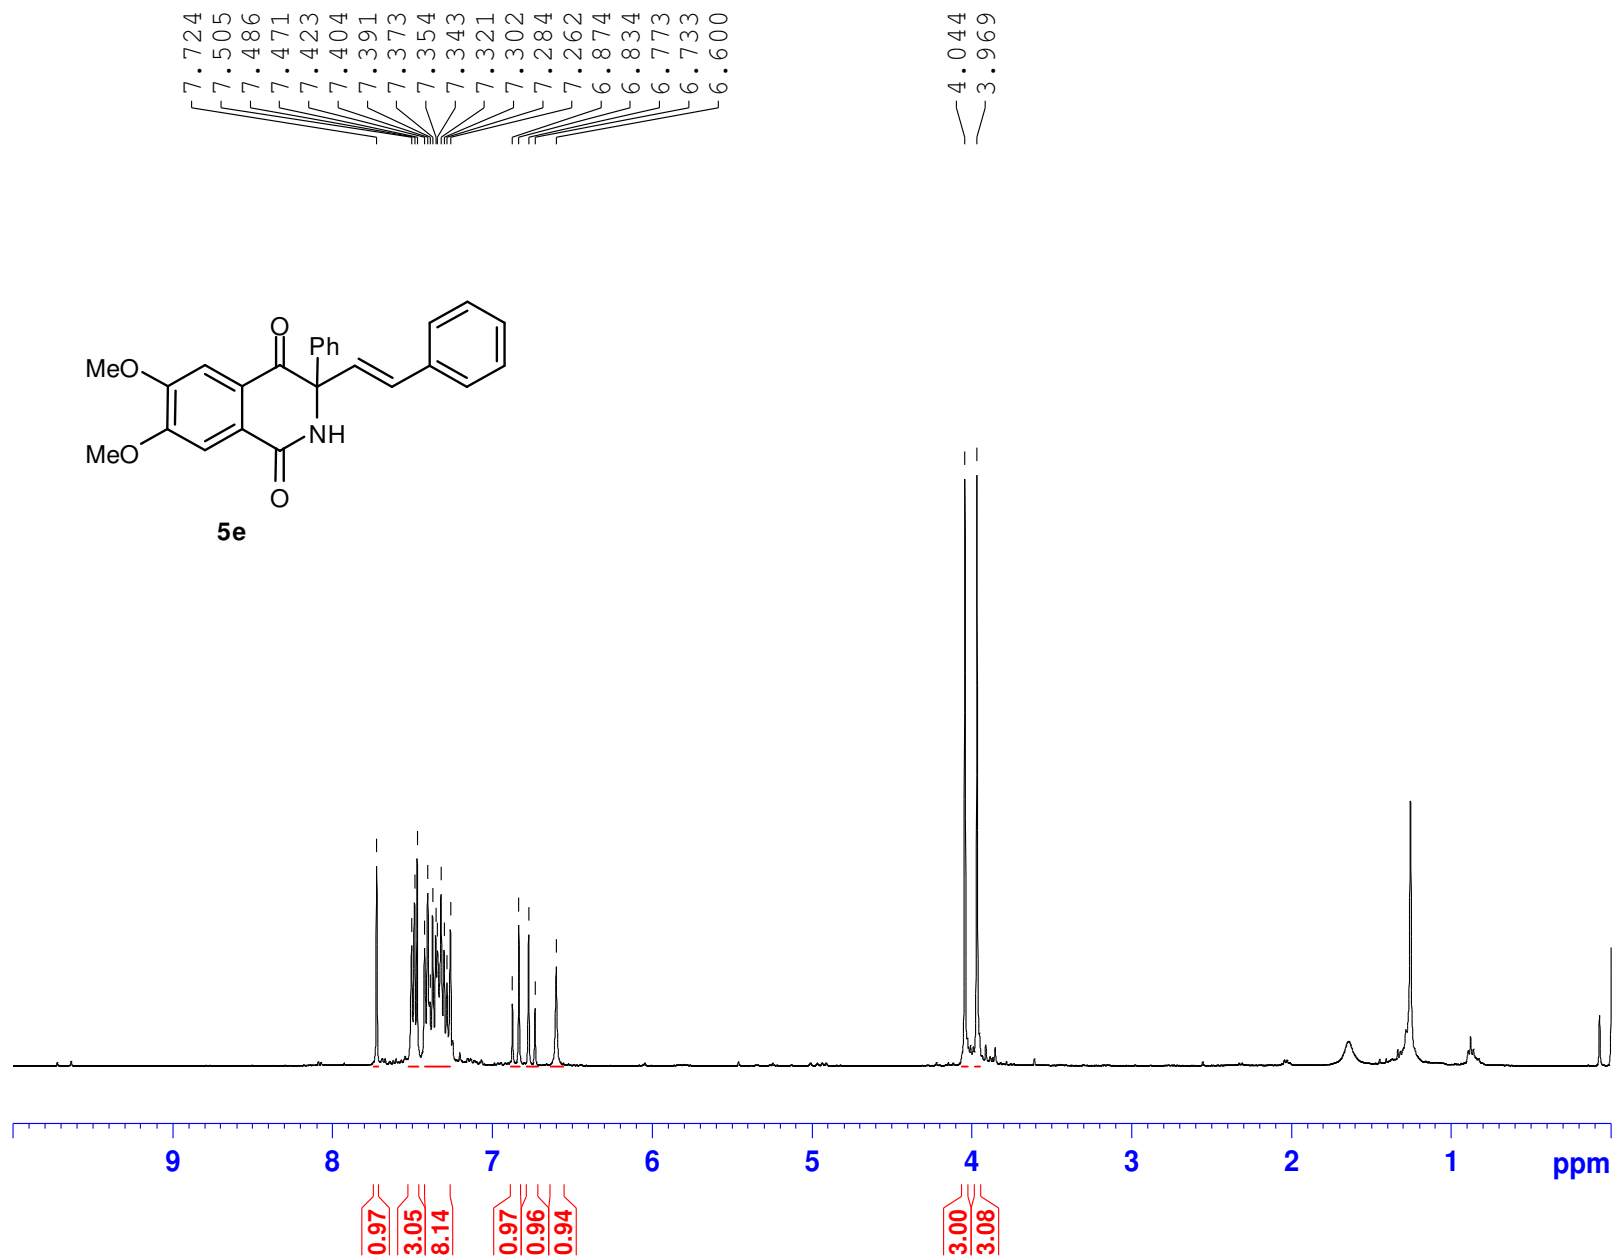

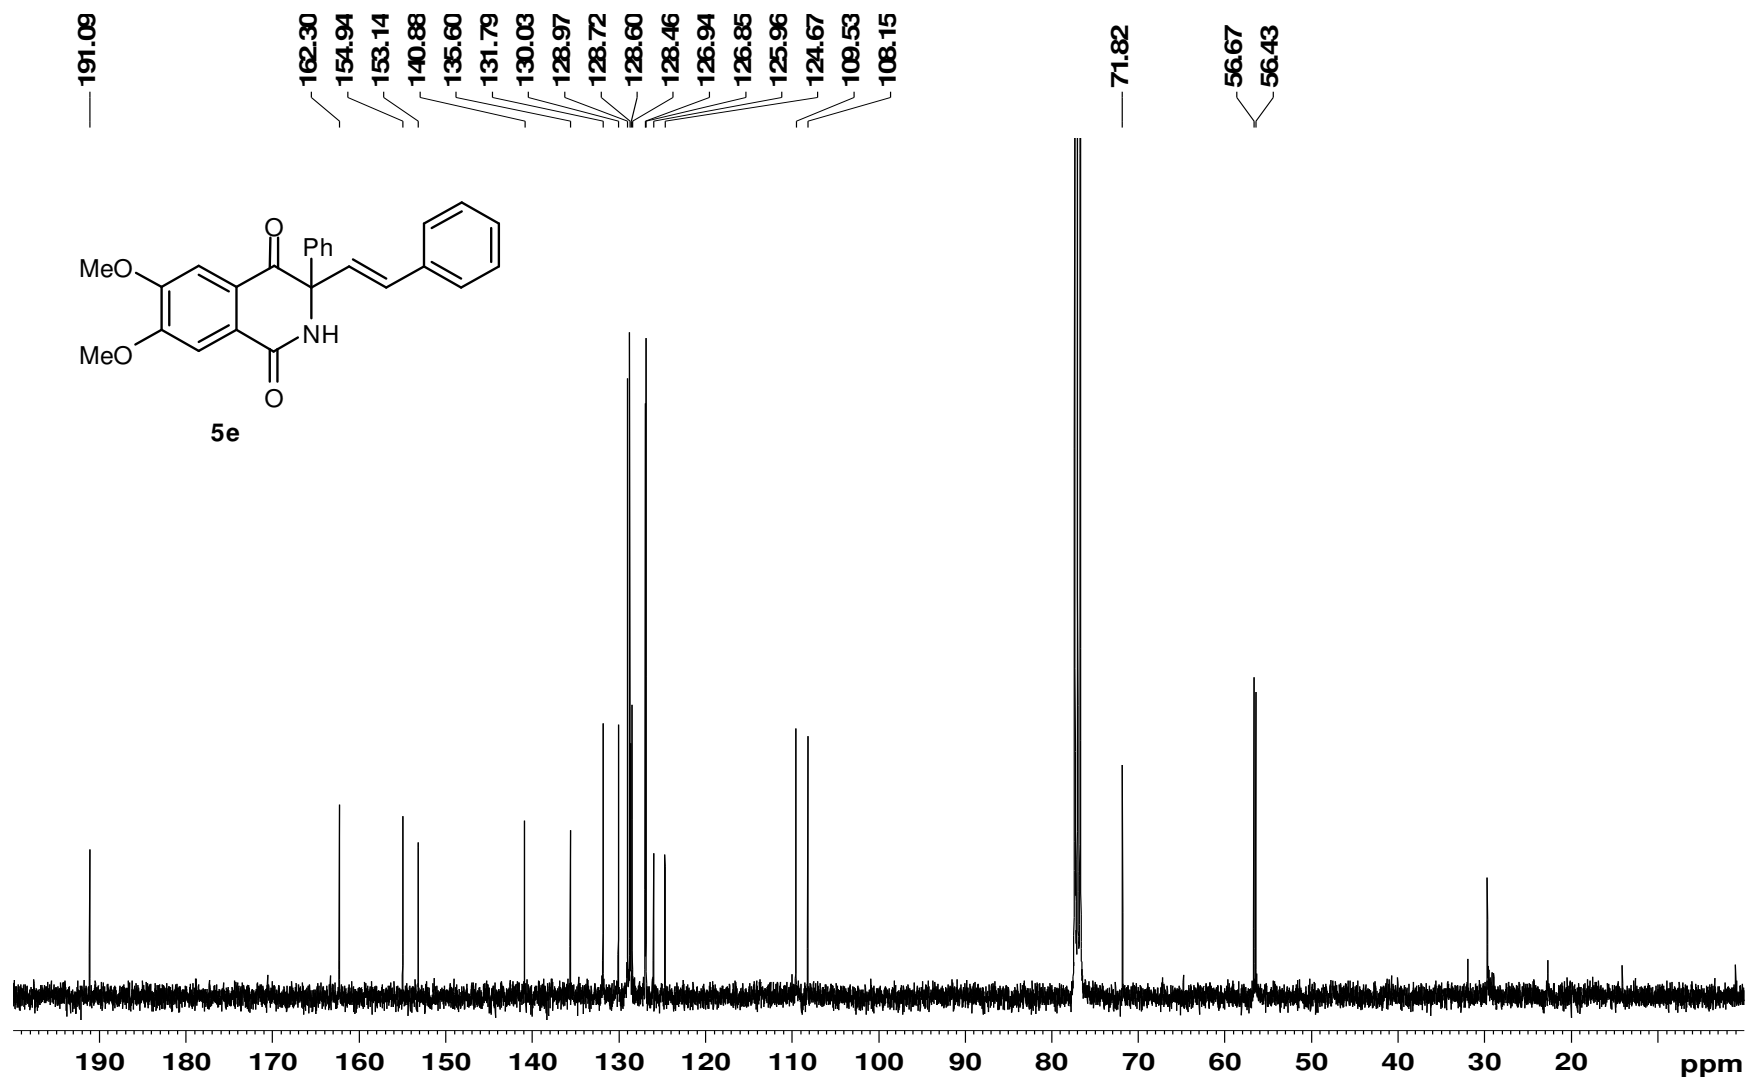

7.766  
7.721  
7.717  
7.700  
7.697  
7.510  
7.506  
7.491  
7.486  
7.455  
7.402  
7.383  
7.379  
7.363  
7.362  
7.350  
7.342  
7.324  
7.261  
6.616

4.074  
3.965

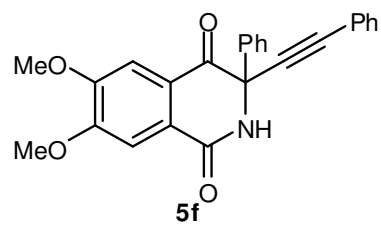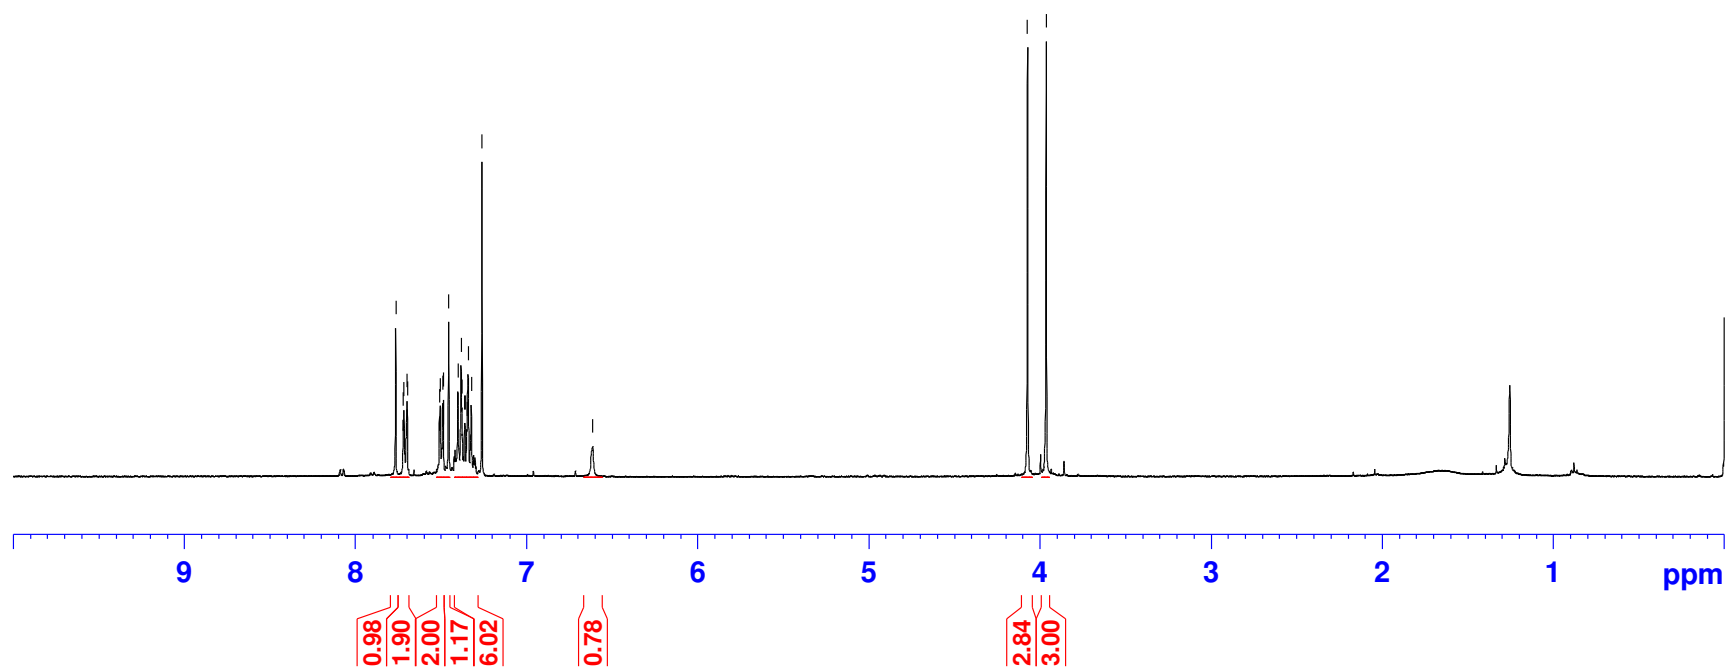



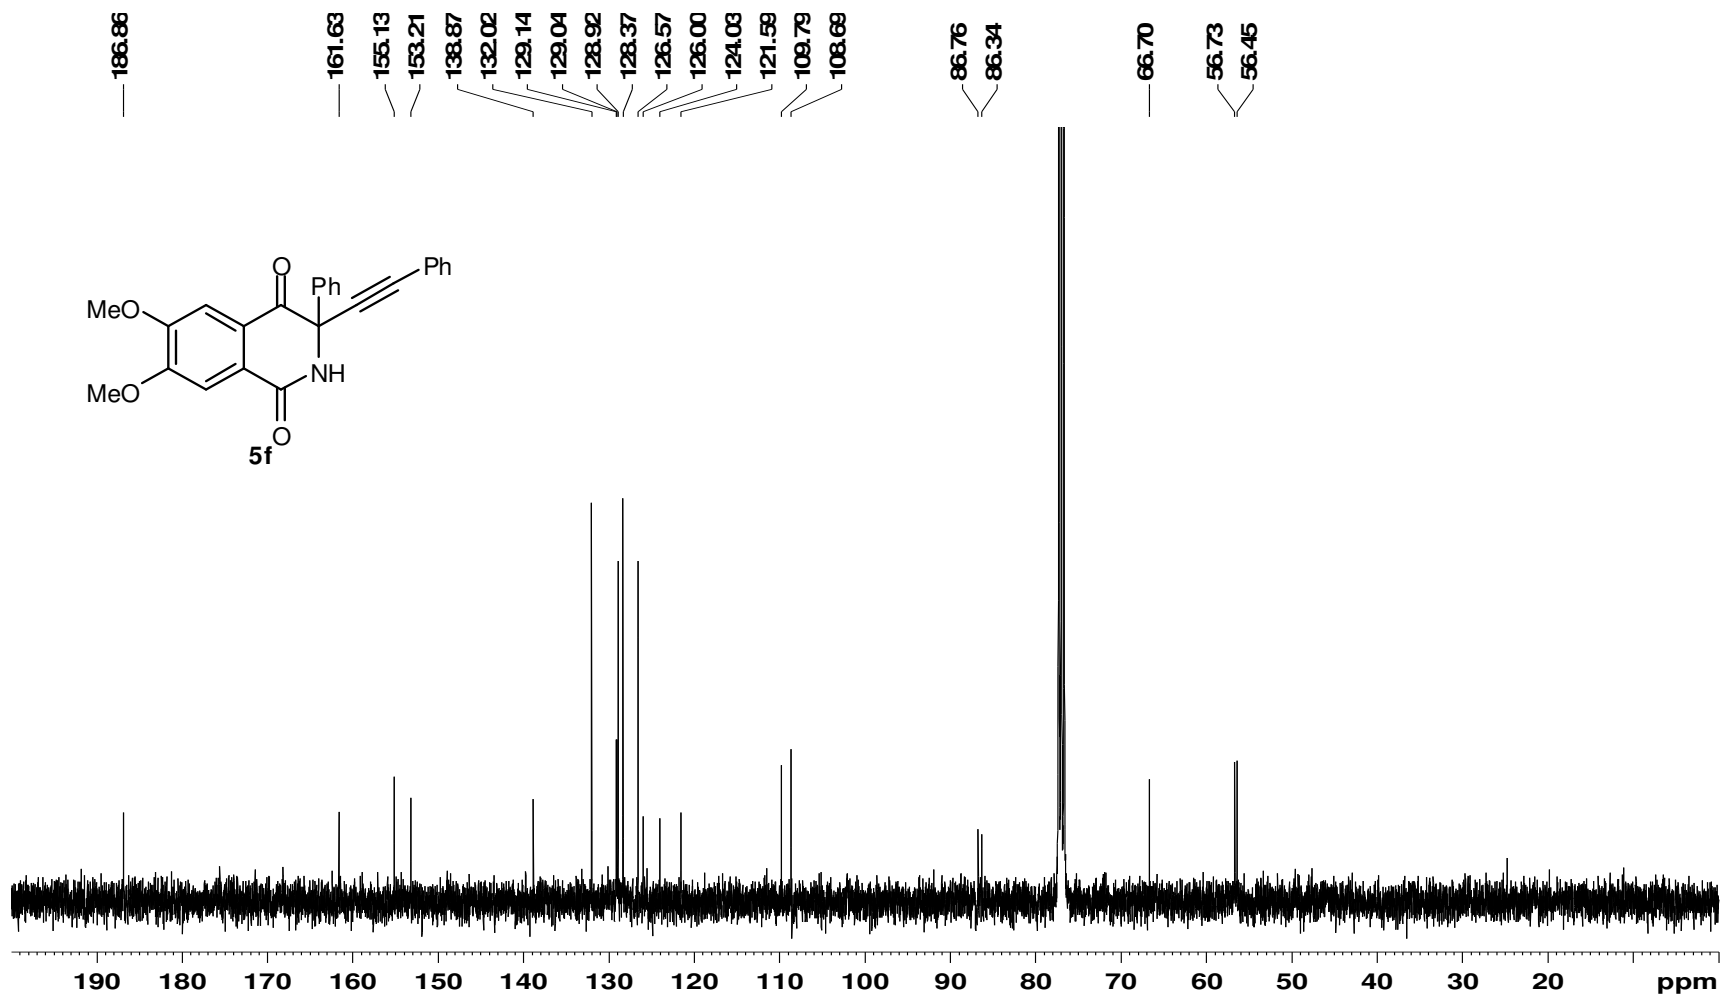

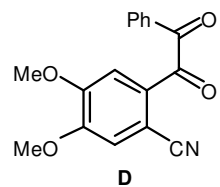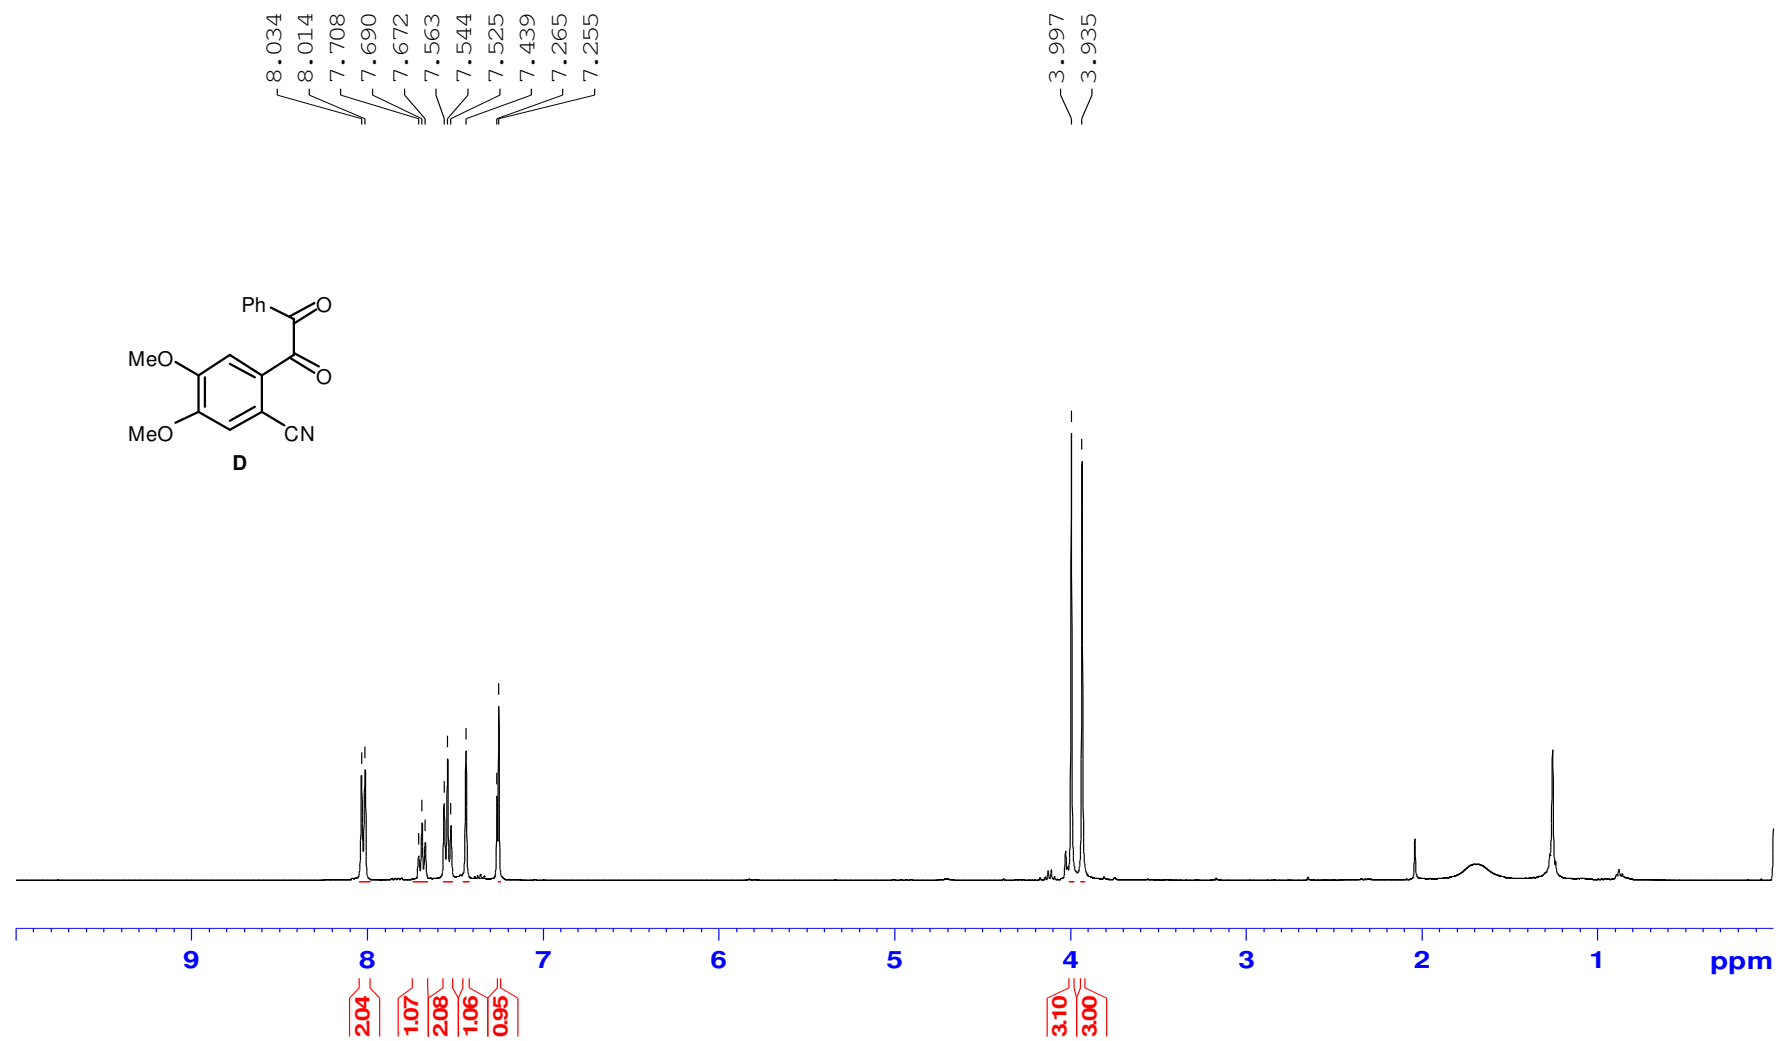

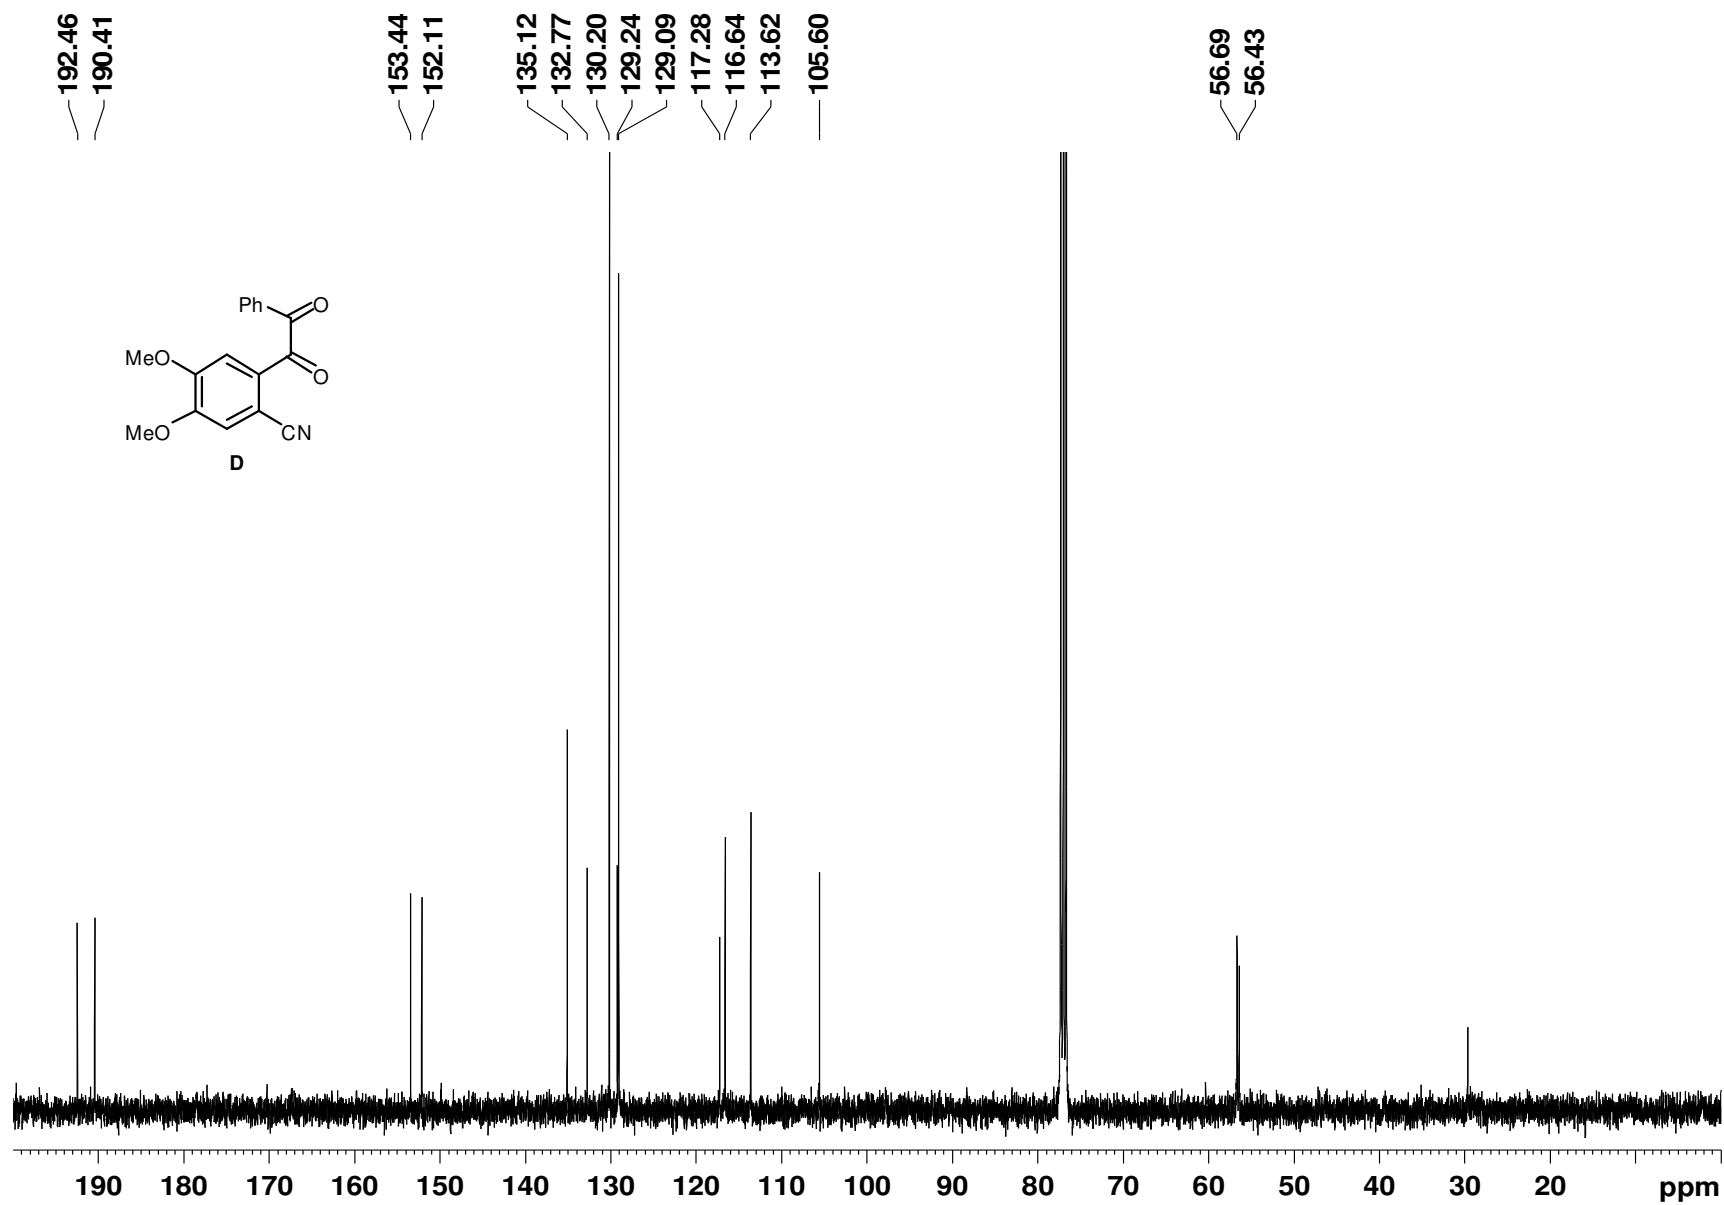

Supplement: c4ob00852a1.pdf [file c4ob00852a1.pdf]
